# Supplementary material for: Heart Failure in Patients with Acute Myeloid Leukemia (AML) Treated with Anthracycline Agents During Remission Induction Therapy: A Systematic Review and Meta-Analysis
Source: Research Square preprint supplement (doi:10.21203/rs.3.rs-6327060/v1), 2025-04-21
Supplement: Supplementary file 1 [file 25cac448c1b6982ce1ccbf98.docx]

**Supplementary appendix**

Table of Contents

| **Content** |  |
| --- | --- |
| 01 - PRISMA checklist…………………………………………………………………………………... | 2 |
| 02 - Search string…………………………………………………………………..…………………..... | 5 |
| 03 - In-/exclusion criteria and excluded studies after full-text screening…..…………………...….. | 6 |
| 04 - Study characteristics……………………………………………………………………………… | 16 |
| 05 - Figure S1: Pooled proportion of patients with heart failure grouped by daunorubicin dose – random effects model …………………………………………………………………………………… | 18 |
| 06 - Figure S2: Pooled proportion of patients with heart failure grouped by daunorubicin dose excluding outlier study – random effects model …………………………...…………………………. | 18 |
| 07 - Figure S3: Pooled proportion of heart failure in patients treated with any mitoxantrone-containing remission induction regimen excluding outlier studies – random effects model …….. | 19 |
| 08 - Figure S4: Pooled proportion of heart failure in patients treated with CPX-351 during remission induction therapy – random effects model ………………………………………………... | 19 |
| 09 - Figure S5: Pooled proportion of patients treated with a remission induction regimen conform ELN 2022 recommendations who died due to heart failure during induction therapy – random effects model ………………………………………………………………………………….... | 20 |
| 10 - Figure S6: Pooled proportion of patients treated with a remission induction regimen conform ELN 2022 recommendations who discontinued treatment due to heart failure – random effects model …………………………………………………………………………………… | 20 |
| 11 - Figure S7: Pooled proportion of grade 3-4 CVAE’s in patients treated with a remission induction regimen conform ELN 2022 recommendations – random effects model ………………. | 21 |
| 12 -Figure S8: Pooled proportion of grade 1-2 CVAE’s in patients treated with a remission induction regimen conform ELN 2022 recommendations – random effects model ………………. | 21 |
| 13 - Assessment of risk of bias and quality of adverse event reporting………………………….… | 22 |
| 14 - References…………………………………………………………………………………………... | 25 |

**1 - PRISMA checklist1**

| **Section and Topic** | **Item #** | **Checklist item** | **Location where item is reported** |
| --- | --- | --- | --- |
| **TITLE** | | | page number |
| Title | 1 | Identify the report as a systematic review. | 1 |
| **ABSTRACT** | | |  |
| Abstract | 2 | See the PRISMA 2020 for Abstracts checklist. | 2 |
| **INTRODUCTION** | | |  |
| Rationale | 3 | Describe the rationale for the review in the context of existing knowledge. | 3-4 |
| Objectives | 4 | Provide an explicit statement of the objective(s) or question(s) the review addresses. | 4 |
| **METHODS** | | |  |
| Eligibility criteria | 5 | Specify the inclusion and exclusion criteria for the review and how studies were grouped for the syntheses. | 5-6, S6 |
| Information sources | 6 | Specify all databases, registers, websites, organisations, reference lists and other sources searched or consulted to identify studies. Specify the date when each source was last searched or consulted. | 5, S5 |
| Search strategy | 7 | Present the full search strategies for all databases, registers and websites, including any filters and limits used. | S5 |
| Selection process | 8 | Specify the methods used to decide whether a study met the inclusion criteria of the review, including how many reviewers screened each record and each report retrieved, whether they worked independently, and if applicable, details of automation tools used in the process. | 6 |
| Data collection process | 9 | Specify the methods used to collect data from reports, including how many reviewers collected data from each report, whether they worked independently, any processes for obtaining or confirming data from study investigators, and if applicable, details of automation tools used in the process. | 6-7 |
| Data items | 10a | List and define all outcomes for which data were sought. Specify whether all results that were compatible with each outcome domain in each study were sought (e.g. for all measures, time points, analyses), and if not, the methods used to decide which results to collect. | 6-7 |
| 10b | List and define all other variables for which data were sought (e.g. participant and intervention characteristics, funding sources). Describe any assumptions made about any missing or unclear information. | 6-7 |
| Study risk of bias assessment | 11 | Specify the methods used to assess risk of bias in the included studies, including details of the tool(s) used, how many reviewers assessed each study and whether they worked independently, and if applicable, details of automation tools used in the process. | 7-8, S22 |
| Effect measures | 12 | Specify for each outcome the effect measure(s) (e.g. risk ratio, mean difference) used in the synthesis or presentation of results. | 7 |
| Synthesis methods | 13a | Describe the processes used to decide which studies were eligible for each synthesis (e.g. tabulating the study intervention characteristics and comparing against the planned groups for each synthesis (item #5)). | 7 |
| 13b | Describe any methods required to prepare the data for presentation or synthesis, such as handling of missing summary statistics, or data conversions. | 7 |
| 13c | Describe any methods used to tabulate or visually display results of individual studies and syntheses. | 7 |
| 13d | Describe any methods used to synthesize results and provide a rationale for the choice(s). If meta-analysis was performed, describe the model(s), method(s) to identify the presence and extent of statistical heterogeneity, and software package(s) used. | 7 |
| 13e | Describe any methods used to explore possible causes of heterogeneity among study results (e.g. subgroup analysis, meta-regression). | 7 |
| 13f | Describe any sensitivity analyses conducted to assess robustness of the synthesized results. | 7 |
| Reporting bias assessment | 14 | Describe any methods used to assess risk of bias due to missing results in a synthesis (arising from reporting biases). | 7 |
| Certainty assessment | 15 | Describe any methods used to assess certainty (or confidence) in the body of evidence for an outcome. | NA |
| **RESULTS** | | |  |
| Study selection | 16a | Describe the results of the search and selection process, from the number of records identified in the search to the number of studies included in the review, ideally using a flow diagram. | 9, Figure 1 |
| 16b | Cite studies that might appear to meet the inclusion criteria, but which were excluded, and explain why they were excluded. | S6-15 |
| Study characteristics | 17 | Cite each included study and present its characteristics. | S16-17 |
| Risk of bias in studies | 18 | Present assessments of risk of bias for each included study. | S24 |
| Results of individual studies | 19 | For all outcomes, present, for each study: (a) summary statistics for each group (where appropriate) and (b) an effect estimate and its precision (e.g. confidence/credible interval), ideally using structured tables or plots. | 9-11; Figures 2-4; Figures S1-S8 |
| Results of syntheses | 20a | For each synthesis, briefly summarise the characteristics and risk of bias among contributing studies. | S24 |
| 20b | Present results of all statistical syntheses conducted. If meta-analysis was done, present for each the summary estimate and its precision (e.g. confidence/credible interval) and measures of statistical heterogeneity. If comparing groups, describe the direction of the effect. | 9-11; Figures 2-4; Figures S1-S8 |
| 20c | Present results of all investigations of possible causes of heterogeneity among study results. | 9-11; Figures 2-4; Figures S1-S8 |
| 20d | Present results of all sensitivity analyses conducted to assess the robustness of the synthesized results. | S18-19 |
| Reporting biases | 21 | Present assessments of risk of bias due to missing results (arising from reporting biases) for each synthesis assessed. | S23; NA |
| Certainty of evidence | 22 | Present assessments of certainty (or confidence) in the body of evidence for each outcome assessed. | NA |
| **DISCUSSION** | | |  |
| Discussion | 23a | Provide a general interpretation of the results in the context of other evidence. | 12-16 |
| 23b | Discuss any limitations of the evidence included in the review. | 15-16 |
| 23c | Discuss any limitations of the review processes used. | 15-16 |
| 23d | Discuss implications of the results for practice, policy, and future research. | 16 |
| **OTHER INFORMATION** | | |  |
| Registration and protocol | 24a | Provide registration information for the review, including register name and registration number, or state that the review was not registered. | S4† |
| 24b | Indicate where the review protocol can be accessed, or state that a protocol was not prepared. | NA |
| 24c | Describe and explain any amendments to information provided at registration or in the protocol. | NA |
| Support | 25 | Describe sources of financial or non-financial support for the review, and the role of the funders or sponsors in the review. | S4‡ |
| Competing interests | 26 | Declare any competing interests of review authors. | 1 |
| Availability of data, code and other materials | 27 | Report which of the following are publicly available and where they can be found: template data collection forms; data extracted from included studies; data used for all analyses; analytic code; any other materials used in the review. | 17 |

†This review was not registered

‡ This study was not funded

**2 - Search string**

| **PubMed** |  |
| --- | --- |
| **Domain** | "leukemia, myeloid, acute"[MeSH Major Topic] OR "acute myeloid leuk*"[Title/Abstract] OR "acute myeloblastic leuk*"[Title/Abstract] OR "acute myelocytic leuk*"[Title/Abstract] OR "acute nonlymphoblastic leuk*"[Title/Abstract] OR "acute non lymphoblastic leuk*"[Title/Abstract] OR "acute nonlymphocytic leuk*"[Title/Abstract] OR "acute non lymphocytic leuk*"[Title/Abstract] OR "acute myelogenous leuk*"[Title/Abstract] OR "acute granulocytic leuk*"[Title/Abstract] OR "acute myelomonocytic leuk*"[Title/Abstract] OR "acute monocytic leuk*"[Title/Abstract] OR "acute erythroid leuk*"[Title/Abstract] OR "acute megakaryoblastic leuk*"[Title/Abstract] OR "acute basophilic leuk*"[Title/Abstract] NOT "promyelocytic leuk*"[Title/Abstract] NOT "progranulocytic leuk*"[Title/Abstract] |
| **Determinant** | "anthracyclines"[MeSH Terms] OR "mitoxantrone"[MeSH Terms] OR "anthracycline*"[Title/Abstract] OR "aclarubicin"[Title/Abstract] OR "daunorubicin"[Title/Abstract] OR "idarubicin"[Title/Abstract] OR "vyxeos"[Title/Abstract] OR "CPX-351"[Title/Abstract] OR "mitoxantrone"[Title/Abstract] OR "7+3"[Title/Abstract] OR "doxorubicin"[Title/Abstract] |
| **Specification** | AND "humans"[MeSH Terms] NOT "review"[Publication Type] NOT "case reports"[Publication Type] AND "english"[Language] NOT "editorial"[Publication Type] |

Date of search: 19-07-2023.
Results: 3668.

Date of search: 13-04-2024
Results: 3758

| **Embase** |  |
| --- | --- |
| **Domain** | 'acute myeloid leukemia'/exp/mj OR 'progranulocytic leu*':ab,ti OR 'acute myeloid leuk*':ab,ti,kw OR 'acute myeloblastic leuk*':ab,ti,kw OR 'acute myelocytic leuk*':ab,ti,kw OR 'acute nonlymphoblastic leuk*':ab,ti,kw OR 'acute non-lymphoblastic leuk*':ab,ti,kw OR 'acute nonlymphocytic leuk*':ab,ti,kw OR 'acute non-lymphocytic leuk*':ab,ti,kw OR 'acute myelogenous leuk*':ab,ti,kw OR 'acute granulocytic leuk*':ab,ti,kw OR 'acute myelomonocytic leuk*':ab,ti,kw OR 'acute monocytic leuk*':ab,ti,kw OR 'acute erythroid leuk*':ab,ti,kw OR 'acute megakaryoblastic leuk*':ab,ti,kw OR 'acute basophilic leuk*':ab,ti,kw NOT 'promyelocytic leuk*':ab,ti NOT 'progranulocytic leu*':ab,ti |
| **Determinant** | 'anthracycline antibiotic agent'/exp OR 'mitoxantrone'/exp OR anthracycline*:ab,ti,kw OR aclarubicin:ab,ti,kw OR daunorubicin:ab,ti,kw OR doxorubicin:ab,ti,kw OR idarubicin:ab,ti,kw OR mitoxantrone:ab,ti,kw OR '7+3':ab,ti,kw OR vyxeos OR 'cpx 351':ab,ti,kw |
| **Specification** | NOT 'conference abstract'/it NOT 'editorial'/it NOT 'review'/it NOT 'short survey'/it NOT 'preprint'/it NOT 'case report':ab,ti,kw NOT 'case series':ab,ti,kw NOT 'in vitro study'/exp AND [abstracts]/lim AND [english]/lim AND [clinical study]/lim AND [humans]/lim |

Date of search: 19-07-2023.Results: 5244.

Date of search: 13-04-2024
Results: 6446

*Cited references or citing references were not examined. Search limits were introduced to exclude non-clinical studies or studies with an ineligible publication type (e.g. case studies and reviews) in advance. Online translation tools were deemed to be insufficiently accurate to enable the inclusion of non-English written articles in the search string. Duplicate records were identified by Rayyan and thereafter manually excluded by one of the authors.*

**3 - Excluded articles after full-text screening**

Articles were screened for the following in- and exclusion criteria:

| **Inclusion criteria** |
| --- |
| Patients with acute myeloid leukemia (all French-American-British (FAB)-subtypes excluding M3) or MDS; |
| Studies conducted in adult patients (≥18 years old) or a median study population age of at least 30 years for studies that included patients <18 years old; |
| Treatment with an intensive remission induction regimen containing either daunorubicin, idarubicin or CPX-351 according to ELN 2022 recommendations2:   - daunorubicin at 60 mg/m² for three days combined with conventional-dose cytarabine (100 or 200 mg/m²) for 7 days; - idarubicin at 12 mg/m² ² for three days combined with conventional-dose cytarabine (100 or 200 mg/m²) for 7 days; - CPX-351 at 100 U/m² on days 1, 3, and 5.   OR   - daunorubicin at 45 mg/m² for three days combined with conventional-dose cytarabine (100 or 200 mg/m²) for 7 days; - daunorubicin at 90 mg/m² for three days combined with conventional-dose cytarabine (100 or 200 mg/m²) for 7 days.   OR  Treatment with an intensive remission induction regimen containing mitoxantrone in combination with cytarabine:   - Due to the limited availability of studies using mitoxantrone in line with ELN 2022 recommendations, we also included studies administering mitoxantrone doses below or above 12 mg/m2 or for less or more than 3 days in combination with varying doses of cytarabine and/or etoposide.   OR  Treatment with an intensive remission induction regimen containing aclarubicin in combination with cytarabine. |
| Reporting of at least one of the following outcomes: incidence of (sub-)clinical heart failure, CVAE’s, death due to heart failure or treatment discontinuation due to heart failure during or shortly after remission induction chemotherapy: at least prior to the initiation of any subsequent cycles of treatment. |

| **Exclusion criteria** |
| --- |
| **Population** |
| Inclusion of patients with acute promyelocytic leukaemia (FAB-M3); |
| Inclusion restricted to only patients with Down’s syndrome; |
| Lack of baseline characteristics for the study cohort; |
| Inclusion of patients with relapsed- or refractory disease. |
| **Treatment** |
| Addition of other antineoplastic agents during remission induction therapy other than cytarabine. Due to a very small number of studies using mitoxantrone in combination with cytarabine only, the concomitant use of etoposide was also permitted for studies using mitoxantrone. |
| Unclear anthracycline dose, including dosage based on body weight instead of body surface area; |
| No uniform remission induction regimen: different anthracycline agents used within the study cohort without possibility to assess what the number of outcomes for patients treated with the same anthracycline agent or within individual patients. |
| **Publication type** |
| Non-English articles; |
| Correspondence; |
| No original study data. |
| **Outcome** |
| Outcomes of interest not reported for the remission induction phase, but only during or after consolidation therapy; |
| Ungraded CVAE’s (with the exception of CVAE’s appointed as ‘severe’). |

For all 722 articles which were excluded after full-text screening, exclusion reasons are listed below:

| **Ref** | **Author** | **Year** | **PubMed/Embase ID** | **Reason for exclusion** |
| --- | --- | --- | --- | --- |
| 1 | Abe et al. | 2011 | L51355245 | outcome; toxicity outcomes (possibly) occurred during consolidation phase |
| 2 | Abou et al. | 2020 | L2004832219 | outcome; no toxicity outcomes reported |
| 3 | Abouzeid et al. | 2023 | L2024676495 | outcome; no toxicity outcomes reported |
| 4 | Abuelgasim et al. | 2020 | L2006172329 | outcome; no toxicity outcomes reported |
| 5 | Adachi et al. | 2007 | L352855804 | outcome; no toxicity outcomes reported |
| 6 | Adamska et al. | 2024 | L2028668371 | treatment; unclear treatment regimen |
| 7 | Aguilera et al. | 2009 | L358116050 | treatment; no uniform treatment regimen |
| 8 | Ahn et al. | 2016 | L606770931 | outcome; no toxicity outcomes reported |
| 9 | Alakel et al. | 2017 | L615479264 | outcome; no cardiotoxicity reported |
| 10 | Alazhary et al. | 2015 | 26107207 | outcome; no toxicity outcomes reported |
| 11 | Al-Bayaa et al. | 2020 | L2004372702 | outcome; no toxicity outcomes reported |
| 12 | Albitar et al. | 2007 | 17215857 | outcome; no toxicity outcomes reported |
| 13 | Alexander et al. | 2017 | 28556917 | treatment; addition of other antineoplastic agent |
| 14 | Al-Ismail et al. | 1977 | 265741 | treatment; no uniform treatment regimen, including other antineoplastic agents |
| 15 | Almeida et al. | 2017 | L615479846 | outcome; toxicity outcomes insufficiently specified |
| 16 | Alnagar et al. | 2020 | L2005431331 | outcome; toxicity outcomes insufficiently specified |
| 17 | Amadori et al. | 1987 | 3476689 | outcome; toxicity reported during consolidation phase |
| 18 | Amadori et al. | 1993 | L23163343 | outcome; toxicity outcomes insufficiently specified |
| 19 | Amadori et al. | 2005 | L40967170 | outcome; toxicity outcomes insufficiently specified |
| 20 | Amadori et al. | 2013 | L373752092 | outcome; toxicity outcomes insufficiently specified |
| 21 | Anak et al. | 2005 | L40629216 | outcome; toxicity outcomes insufficiently specified |
| 22 | Anderlini et al. | 1995 | 7595745 | outcome; toxicity reported during consolidation phase |
| 23 | Anderson et al. | 2002 | 12393614 | outcome; toxicity outcomes insufficiently specified |
| 24 | Ando et al. | 2017 | L614148209 | treatment; no uniform treatment regimen |
| 25 | Ansari et al. | 1975 | 1059477 | outcome; no toxicity outcomes reported |
| 26 | Aœlkul et al. | 1994 | L24172980 | outcome; only cardiac rhythm AE's depicted, LVEF changes insufficiently specified |
| 27 | Arcese et al. | 1984 | 6091244 | outcome; no toxicity outcomes reported |
| 28 | Archimbaud et al. | 1999 | L29292132 | outcome; toxicity outcomes insufficiently specified |
| 29 | Ardelean et al. | 2023 | L2025658482 | outcome; toxicity outcomes possibly not reported during induction therapy |
| 30 | Arellano et al. | 2012 | L51503785 | treatment; regimen not according to ELN-2022 guidelines |
| 31 | Aribi et al. | 2023 | 37533373 | outcome; toxicity outcomes insufficiently specified |
| 32 | Armata et al. | 1971 | 5283300 | treatment; unclear anthracycline dose based on body weight |
| 33 | Aström et al. | 2000 | L30175902 | treatment; no uniform treatment regimen |
| 34 | Athale et al. | 2001 | L35107129 | treatment; no uniform treatment regimen |
| 35 | Atkinson et al. | 1974 | 4141625 | outcome; no toxicity outcomes reported |
| 36 | Azevedo et al. | 2015 | L602074823 | treatment; no uniform treatment regimen |
| 37 | Aznab et al. | 2017 | L618603562 | outcome; no toxicity outcomes reported |
| 38 | Baek et al. | 2007 | 17135724 | outcome; no toxicity outcomes reported |
| 39 | Baek et al. | 2019 | L629755823 | outcome; no toxicity outcomes reported |
| 40 | Baer et al. | 2002 | 12149202 | outcome; toxicity outcomes insufficiently specified |
| 41 | Baer et al. | 2011 | 21321569 | treatment; regimen not according to ELN-2022 guidelines |
| 42 | Bahl et al. | 2015 | 25639656 | treatment; unclear anthracycline dose |
| 43 | Baldus et al. | 2002 | L34534858 | outcome; no toxicity outcomes reported |
| 44 | Ballesteros et al. | 2021 | L2007047052 | treatment; unclear treatment regimen |
| 45 | Baron et al. | 2020 | 32233095 | outcome; no toxicity outcomes reported |
| 46 | Baron et al. | 2019 | L2002216366 | outcome; no toxicity outcomes reported |
| 47 | Bassan et al. | 1992 | L23050932 | treatment; addition of other antineoplastic agent |
| 48 | Baudard et al. | 1994 | 8011551 | outcome; no toxicity outcomes reported |
| 49 | Baudo et al. | 1968 | 5242863 | population; patients with CML included |
| 50 | Bauduer et al. | 1999 | L29572290 | treatment; no uniform treatment regimen |
| 51 | Bauduer et al. | 2000 | L31006307 | outcome; toxicity outcomes insufficiently specified |
| 52 | Baz et al. | 2007 | 17724726 | outcome; no toxicity outcomes reported |
| 53 | Bazinet et al. | 2023 | L640529681 | outcome; no toxicity outcomes reported |
| 54 | Bazzell et al. | 2022 | L2012309588 | outcome; no toxicity outcomes reported |
| 55 | Béhar et al. | 1996 | L26046147 | outcome; same cohort as other included study |
| 56 | Bell et al. | 2019 | 30716655 | outcome; no toxicity outcomes reported |
| 57 | Bello et al. | 2011 | 21425147 | outcome; no toxicity outcomes reported |
| 58 | Benicio et al. | 2017 | L617586899 | outcome; no toxicity outcomes reported |
| 59 | Benitez et al. | 2021 | 33830856 | population; same study population as other included study |
| 60 | Berger et al. | 2005 | 16166053 | outcome; toxicity outcomes insufficiently specified |
| 61 | Berger et al. | 2019 | 31512015 | outcome; toxicity outcomes insufficiently specified |
| 62 | Berman et al. | 1991 | 2015395 | outcome; toxicity reported during consolidation phase |
| 63 | Berman et al. | 1997 | 9395031 | outcome; no toxicity outcomes reported |
| 64 | Bernal et al. | 2023 | 37212507 | outcome; no cardiotoxicity outcomes reported |
| 65 | Bernasconi et al. | 1998 | L28387049 | outcome; no toxicity outcomes reported |
| 66 | Bertoli et al. | 2014 | L372134397 | treatment; no uniform treatment regimen |
| 67 | Bertoli et al. | 2016 | L613931204 | treatment; no uniform treatment regimen |
| 68 | Bertoli et al. | 2019 | L628614930 | outcome; toxicity outcomes insufficiently specified |
| 69 | Bessho et al. | 1991 | 1792913 | treatment; addition of other antineoplastic agent |
| 70 | Bettelheim et al. | 1991 | 1993213 | outcome; toxicity outcomes insufficiently specified |
| 71 | Bezwoda et al. | 1990 | L20268703 | treatment; wrong anthracycline agent |
| 72 | Bhatt et al. | 2023 | L2025711832 | outcome; trials already included in systematic review |
| 73 | Billström et al. | 1988 | 2833409 | outcome; no toxicity outcomes reported |
| 74 | Bishop et al. | 1990 | 2403818 | outcome; toxicity outcomes insufficiently specified |
| 75 | Bishop et al. | 1994 | 7858505 | outcome; no toxicity outcomes reported |
| 76 | Bishop et al. | 1996 | 8634416 | outcome; toxicity outcomes insufficiently specified |
| 77 | Bishop et al. | 1991 | L21095949 | publication type; review |
| 78 | Bjorkholm et al. | 1990 | L20075547 | population; patients with relapsed-/refractory disease included |
| 79 | Blum et al. | 2017 | L612619675 | outcome; toxicity outcomes (possibly) occurred during consolidation phase |
| 80 | Boddu et al. | 2017 | L615411072 | outcome; no toxicity outcomes reported |
| 81 | Böhm et al. | 2005 | 15863199 | outcome; no toxicity outcomes reported |
| 82 | Boluda et al. | 2023 | L2022929567 | treatment; no uniform treatment regimen |
| 83 | Borel et al. | 2012 | L52145821 | treatment; unclear treatment regimen |
| 84 | Bories et al. | 2014 | L605650496 | outcome; cardiotoxicity outcomes not graded |
| 85 | Borlenghi et al. | 2020 | L2006821244 | treatment; regimen not according to ELN-2022 guidelines |
| 86 | Borlenghi et al. | 2022 | L2019546398 | outcome; toxicity outcomes (possibly) occurred during consolidation phase |
| 87 | Both et al. | 2017 | L614965278 | publication type; no original data |
| 88 | Bottinor et al. | 2023 | L2022929543 | population; patients with other cancer types included |
| 89 | Boujmia et al. | 2021 | L2011606743 | outcome; no toxicity outcomes reported |
| 90 | Bourne et al. | 2024 | L2030877293 | outcome; no cardiotoxicity outcomes reported |
| 91 | Bouvier et al. | 2021 | L2011198078 | outcome; no cardiotoxicity outcomes reported |
| 92 | Bow et al. | 1994 | 8004583 | treatment; no uniform treatment regimen |
| 93 | Bow et al. | 1996 | 8648393 | outcome; toxicity outcomes insufficiently specified |
| 94 | Boye et al. | 1995 | L25043191 | outcome; no cardiotoxicity outcomes reported |
| 95 | Boztug et al. | 2014 | L53032334 | publication type; no original data |
| 96 | Bradstock et al. | 2014 | 25142189 | outcome; no cardiotoxicity outcomes reported |
| 97 | Bradstock et al. | 2001 | 11516093 | treatment; regimen not according to ELN-2022 guidelines |
| 98 | Bradstock et al. | 2005 | 15213095 | publication type; no original data |
| 99 | Braunagel et al. | 2012 | L364654072 | outcome; no cardiotoxicity reported |
| 100 | Bray et al. | 2015 | 26231954 | treatment; unclear anthracycline dose |
| 101 | Brenner et al. | 1984 | L14196480 | outcome; no cardiotoxicity outcomes reported |
| 102 | Brincker et al. | 1972 | 4509284 | outcome; toxicity outcomes insufficiently specified |
| 103 | Browman et al. | 1989 | L19121331 | outcome; no toxicity outcomes reported |
| 104 | Brunner et al. | 2013 | L369443834 | treatment; no uniform treatment regimen |
| 105 | Bryant et al. | 2015 | 24913512 | treatment; induction schedule not specified |
| 106 | Büchner et al. | 2009 | 19047294 | outcome; no toxicity outcomes reported |
| 107 | Büchner et al. | 2012 | L365870366 | outcome; no toxicity outcomes reported |
| 108 | Büchner et al. | 1979 | 476310 | treatment; unclear anthracycline dose |
| 109 | Büchner et al. | 2006 | L46655599 | treatment; regimen not according to ELN-2022 guidelines |
| 110 | Buckley et al. | 1989 | 2677628 | outcome; toxicity outcomes insufficiently specified |
| 111 | Buckley et al. | 2014 | 24382796 | outcome; toxicity outcomes insufficiently specified |
| 112 | Budziszewska et al. | 2015 | L606339095 | outcome; no toxicity outcomes reported |
| 113 | Bug et al. | 2014 | L52747679 | outcome; toxicity outcomes insufficiently specified |
| 114 | Burd et al. | 2020 | 33106665 | outcome; toxicity outcomes insufficiently specified |
| 115 | Burnett et al. | 2009 | 19291085 | outcome; toxicity outcomes insufficiently specified |
| 116 | Burnett et al. | 2016 | 27268085 | publication type; letter to the editor |
| 117 | Burnett et al. | 2013 | 23940227 | treatment; addition of other antineoplastic agent |
| 118 | Burnett et al. | 2015 | 25833957 | outcome; toxicity outcomes insufficiently specified |
| 119 | Burnett et al. | 2012 | 22851554 | treatment; addition of other antineoplastic agent |
| 120 | Burnett et al. | 1998 | L28105339 | outcome; toxicity outcomes (possibly) occurred during consolidation phase |
| 121 | Burnett et al. | 2010 | L358619727 | outcome; toxicity outcomes insufficiently specified |
| 122 | Burnett et al. | 2017 | L612477593 | treatment; addition of other antineoplastic agent |
| 123 | Burnett et al. | 2021 | L2024968717 | outcome; no toxicity outcomes reported |
| 124 | Burnett et al. | 2013 | L617279062 | treatment; no treatment with anthracycline agent |
| 125 | Burnusuzov et al. | 2018 | L624596807 | treatment; no uniform treatment regimen |
| 126 | Byrd et al. | 1999 | L29585994 | outcome; toxicity outcomes (possibly) occurred during consolidation phase |
| 127 | Byun et al. | 2020 | L2004491109 | outcome; toxicity outcomes (possibly) occurred during consolidation phase |
| 128 | Calvillo-Argüelles et al. | 2022 | L2017140669 | treatment; no uniform treatment regimen |
| 129 | Cao et al. | 2017 | L619301456 | treatment; no uniform treatment regimen |
| 130 | Capelli et al. | 2020 | 32297279 | treatment; use of amifostine |
| 131 | Carella et al. | 1990 | L21128322 | outcome; toxicity outcomes (possibly) occurred during consolidation phase |
| 132 | Carella et al. | 1987 | 3480803 | treatment; regimen not according to ELN-2022 guidelines |
| 133 | Carey et al. | 1975 | 1059499 | population; patients with APL included |
| 134 | Cascino et al. | 2019 | L2003561210 | outcome; cardiotoxicity outcomes insufficiently specified |
| 135 | Case et al. | 1987 | 3479891 | population; patients with relapsed-/refractory disease included |
| 136 | Cassileth et al. | 2005 | 15621781 | treatment; regimen not according to ELN-2022 guidelines |
| 137 | Cassileth et al. | 1998 | L28550689 | outcome; toxicity outcomes (possibly) occurred during consolidation phase |
| 138 | Castagnola et al. | 2001 | L32515047 | outcome; toxicity outcomes (possibly) occurred during consolidation phase |
| 139 | Castaigne et al. | 2004 | L39331849 | outcome; toxicity outcomes insufficiently specified |
| 140 | Castaigne et al. | 2012 | L51947545 | outcome; toxicity outcomes (possibly) occurred during consolidation phase |
| 141 | Castaneda-Avila et al. | 2022 | L2019312747 | outcome; no toxicity outcomes reported |
| 142 | Castellino et al. | 2008 | L350234258 | publication type; no original data |
| 143 | Cesaro et al. | 2001 | L32725713 | outcome; toxicity outcomes (possibly) occurred during consolidation phase |
| 144 | Chan et al. | 2004 | 15352983 | outcome; no toxicity outcomes reported |
| 145 | Chanswangphuwana et al. | 2022 | 36117042 | outcome; no toxicity outcomes reported |
| 146 | Chaoui et al. | 2005 | L40227366 | outcome; toxicity outcomes possibly reported during consolidation phase |
| 147 | Chauncey et al. | 2010 | 19821823 | outcome; toxicity outcomes insufficiently specified |
| 148 | Chen et al. | 2018 | 29975953 | population; patients with relapsed-/refractory disease included |
| 149 | Chen et al. | 2020 | 33323826 | treatment; no uniform treatment regimen |
| 150 | Chen et al. | 2020 | L2003502163 | outcome; toxicity outcomes insufficiently specified |
| 151 | Chen et al. | 2018 | L620649171 | outcome; toxicity outcomes (possibly) occurred during consolidation phase |
| 152 | Chen et al. | 2016 | L611566394 | outcome; no toxicity outcomes reported |
| 153 | Chessells et al. | 2002 | L34537548 | outcome; no toxicity outcomes reported |
| 154 | Chim et al. | 1999 | L29530191 | outcome; only long-term toxicity outcomes reported |
| 155 | Choi et al. | 2018 | 29544132 | outcome; no toxicity outcomes reported |
| 156 | Choi et al. | 2019 | 30879987 | outcome; no toxicity outcomes reported |
| 157 | Choi et al. | 2020 | L2010611943 | treatment; addition of other antineoplastic agent |
| 158 | Choi et al. | 2015 | L600299141 | treatment; no uniform treatment regimen |
| 159 | Ciftciler et al. | 2019 | 31540855 | treatment; regimen not according to ELN-2022 guidelines |
| 160 | Colovic et al. | 2020 | L2002303575 | outcome; no toxicity outcomes reported |
| 161 | Conde et al. | 1988 | L18078470 | outcome; toxicity outcomes (possibly) occurred during consolidation phase |
| 162 | Conyers et al. | 2017 | L618682002 | treatment; no uniform treatment regimen |
| 163 | Copplestone et al. | 1989 | L19032262 | outcome; no toxicity outcomes reported |
| 164 | Cornelissen et al. | 2012 | L365265699 | outcome; no toxicity outcomes reported |
| 165 | Cortes et al. | 2003 | 12599230 | outcome; no toxicity outcomes reported |
| 166 | Cortes et al. | 2019 | 31516032 | publication type; study protocol |
| 167 | Cortes et al. | 2022 | L2019833598 | outcome; toxicity outcomes possibly reported during consolidation phase |
| 168 | Cortes et al. | 2021 | L2013146498 | outcome; toxicity outcomes possibly reported during consolidation phase |
| 169 | Cremer et al. | 2023 | L2024847885 | treatment; unclear treatment regimen |
| 170 | Creutzig et al. | 2008 | 18076087 | outcome; no toxicity outcomes reported |
| 171 | Creutzig et al. | 2000 | 10673757 | publication type; letter to the editor |
| 172 | Creutzig et al. | 1990 | 2186819 | outcome; no toxicity outcomes reported |
| 173 | Creutzig et al. | 2012 | 21968880 | treatment; unclear anthracycline dose |
| 174 | Creutzig et al. | 2006 | 16983120 | outcome; toxicity outcomes insufficiently specified |
| 175 | Creutzig et al. | 2004 | 15514380 | publication type; no original data |
| 176 | Creutzig et al. | 2011 | L362959620 | outcome; no toxicity outcomes reported |
| 177 | Creutzig et al. | 2015 | L604427558 | outcome; toxicity outcomes (possibly) occurred during consolidation phase |
| 178 | Creutzig et al. | 2000 | L30650549 | treatment; no uniform treatment regimen |
| 179 | Creutzig et al. | 2001 | L32243767 | outcome; cardiotoxicity insufficiently specified |
| 180 | Creutzig et al. | 2001 | L32441376 | outcome; toxicity outcomes (possibly) occurred during consolidation phase |
| 181 | Creutzig et al. | 2005 | L41741595 | outcome; toxicity outcomes insufficiently specified |
| 182 | Cripe et al. | 2010 | L359989692 | outcome; cardiotoxicity outcomes insufficiently specified |
| 183 | Crowther et al. | 1970 | 4921703 | treatment; addition of other antineoplastic agent |
| 184 | Crowther et al. | 1973 | 4513355 | treatment; unclear anthracycline dose based on body weight |
| 185 | Cuckle et al. | 1979 | L9094301 | treatment; unclear anthracycline dose based on body weight |
| 186 | Curtis et al. | 1979 | 297177 | outcome; no toxicity outcomes reported |
| 187 | Curtis et al. | 2000 | L30793749 | outcome; no toxicity outcomes reported |
| 188 | Dalley et al. | 2001 | L33138725 | outcome; no cardiotoxicity outcomes reported |
| 189 | Damiani et al. | 1998 | 9697878 | outcome; toxicity outcomes insufficiently specified |
| 190 | Damon et al. | 2004 | L38680243 | outcome; toxicity outcomes insufficiently specified |
| 191 | Daver et al. | 2023 | L2023066537 | outcome; no cardiotoxicity outcomes reported |
| 192 | Davies et al. | 2001 | L32202531 | treatment; addition of other antineoplastic agent |
| 193 | De Nully Brown et al. | 1997 | 9403009 | outcome; no toxicity outcomes reported |
| 194 | De Witte et al. | 2010 | L359742894 | outcome; no toxicity outcomes reported |
| 195 | De Witte et al. | 2001 | L35119454 | outcome; no toxicity outcomes reported |
| 196 | Dehgolan et al. | 2014 | L373871125 | language; non-English written article |
| 197 | DeLima et al. | 1996 | 8611481 | treatment; no uniform treatment regimen |
| 198 | Demichelis-Gómez et al. | 2020 | L2005244068 | outcome; no toxicity outcomes reported |
| 199 | Devillier et al. | 2015 | 25363834 | publication type; letter to the editor |
| 200 | Di et al. | 2020 | L2003631674 | outcome; no cardiotoxicity outcomes reported |
| 201 | Dillman et al. | 1991 | L22021466 | outcome; toxicity outcomes insufficiently specified |
| 202 | Ding et al. | 2024 | 38323781 | outcome; cardiotoxicity outcomes insufficiently specified |
| 203 | Dluzniewska et al. | 2005 | 16107894 | outcome; no toxicity outcomes reported |
| 204 | Dobashi et al. | 2011 | L361863293 | treatment; regimen not according to ELN-2022 guidelines |
| 205 | Dolatkhah et al. | 2019 | L2002988230 | outcome; toxicity reported during consolidation phase |
| 206 | Dombret et al. | 1995 | L25181503 | outcome; deaths possibly occurred during consolidation phase |
| 207 | Dombret et al. | 2015 | L605290095 | outcome; toxicity outcomes insufficiently specified |
| 208 | Dou et al. | 2019 | L2002270377 | outcome; toxicity outcomes not graded |
| 209 | Doukas et al. | 2023 | L2019958215 | treatment; no uniform treatment regimen |
| 210 | Duan et al. | 2023 | 37572135 | outcome; toxicity outcomes insufficiently specified |
| 211 | Dubovsky et al. | 1978 | 738325 | outcome; toxicity outcomes insufficiently specified |
| 212 | Dumas et al. | 2017 | L618556413 | treatment; no uniform treatment regimen |
| 213 | Dvorak et al. | 2015 | L605051813 | outcome; toxicity outcomes insufficiently specified |
| 214 | Ehninger et al. | 1990 | 2182425 | treatment; no cytarabine used |
| 215 | Eivazi-Ziaei et al. | 2005 | L43730036 | publication type; no original data |
| 216 | Eivazi-Ziaei et al. | 2009 | L355540611 | outcome; no toxicity outcomes reported |
| 217 | Eksborg et al. | 1997 | L27064748 | outcome; toxicity outcomes insufficiently specified |
| 218 | El Gammal et al. | 2019 | L2001869375 | outcome; no toxicity outcomes reported |
| 219 | El Omri et al. | 2020 | L632195196 | outcome; no toxicity outcomes reported |
| 220 | Elgarten et al. | 2021 | 34596937 | outcome; toxicity outcomes insufficiently specified |
| 221 | Elliott et al. | 2002 | L34232926 | outcome; no toxicity outcomes reported |
| 222 | El-Tokhy et al. | 2014 | L600970635 | outcome; cardiotoxicity outcomes not graded |
| 223 | Enssle et al. | 2023 | L2024835825 | outcome; cardiotoxicity outcomes insufficiently specified |
| 224 | Entezari-Maleki et al. | 2012 | L365232067 | population; patients with ALL included |
| 225 | Erba et al. | 2023 | 37116523 | treatment; no uniform treatment regimen |
| 226 | Erba et al. | 2022 | L2020267872 | publication type; abstract |
| 227 | Estey et al. | 1993 | 7510196 | outcome; no toxicity outcomes reported |
| 228 | Estey et al. | 2002 | 12036860 | outcome; no toxicity outcomes reported |
| 229 | Estey et al. | 2007 | L46239569 | outcome; no toxicity outcomes reported |
| 230 | Estey et al. | 1992 | L22192949 | outcome; toxicity outcomes insufficiently specified |
| 231 | Estey et al. | 2001 | L35119358 | outcome; no toxicity outcomes reported |
| 232 | Estey et al. | 1999 | L29292133 | outcome; no cardiotoxicity reported |
| 233 | Etienne et al. | 2007 | L46466565 | treatment; no uniform treatment regimen |
| 234 | Fagundes et al. | 2006 | L44364021 | outcome; toxicity outcomes insufficiently specified |
| 235 | Fanciullino et al. | 2018 | 29490977 | outcome; toxicity outcomes insufficiently specified |
| 236 | Farag et al. | 2005 | 15534356 | outcome; no toxicity outcomes reported |
| 237 | Fattoum et al. | 2015 | 25843415 | outcome; no toxicity outcomes reported |
| 238 | Feldman et al. | 1993 | 8410125 | population; patients with ALL included |
| 239 | Feldman et al. | 2012 | L52132253 | outcome; toxicity outcomes insufficiently specified |
| 240 | Felice et al. | 2016 | L607623102 | outcome; toxicity outcomes insufficiently specified |
| 241 | Fenaux et al. | 1991 | 2025575 | outcome; toxicity outcomes insufficiently specified |
| 242 | Fenaux et al. | 2010 | L358619724 | outcome; toxicity outcomes insufficiently specified |
| 243 | Fernandez et al. | 2019 | 30467203 | publication type; letter to the editor |
| 244 | Fernandez et al. | 2011 | 21415269 | outcome; toxicity outcomes (possibly) occurred during consolidation phase |
| 245 | Fernandez et al. | 2009 | L355360682 | treatment; regimen not according to ELN-2022 guidelines |
| 246 | Ferrant et al. | 1992 | 1581406 | treatment; unclear anthracycline dose |
| 247 | Ferrara et al. | 2006 | L44364025 | treatment; no uniform treatment regimen |
| 248 | Fianchi et al. | 2023 | L2024434883 | outcome; cause of death specified after consolidation therapy |
| 249 | Fiedler et al. | 2015 | L604385800 | treatment; addition of other antineoplastic agent |
| 250 | Fink et al. | 1986 | 3528963 | outcome; no toxicity outcomes reported |
| 251 | Flasshove et al. | 2000 | 11100742 | treatment; no uniform treatment regimen |
| 252 | Fleischmann et al. | 2022 | 34297206 | treatment; no uniform treatment regimen |
| 253 | Foran et al. | 2023 | L2022855447 | outcome; toxicity outcomes insufficiently specified |
| 254 | Freeman et al. | 1973 | 4519012 | outcome; no toxicity outcomes reported |
| 255 | Friedenberg et al. | 1995 | L25096941 | outcome; toxicity outcomes possibly reported during consolidation phase |
| 256 | Friend et al. | 1974 | 4522738 | treatment; unclear anthracycline dose based on body weight |
| 257 | Fujiwara et al. | 2022 | L2020191002 | treatment; no uniform treatment regimen |
| 258 | Fukushima et al. | 2012 | L364658806 | outcome; toxicity outcomes insufficiently specified |
| 259 | Gahrton et al. | 1979 | L9214832 | treatment; unclear anthracycline dose based on body weight |
| 260 | Ganser et al. | 2000 | 10663618 | outcome; toxicity outcomes (possibly) occurred during consolidation phase |
| 261 | Ganser et al. | 1993 | L23104728 | outcome; toxicity outcomes insufficiently specified |
| 262 | Gardin et al. | 1997 | 9001413 | outcome; toxicity outcomes insufficiently specified |
| 263 | Gardin et al. | 2013 | L368273341 | outcome; no toxicity outcomes reported |
| 264 | Gardin et al. | 2007 | L46900774 | outcome; toxicity outcomes insufficiently specified |
| 265 | Geller et al. | 1989 | 2676014 | outcome; toxicity outcomes insufficiently specified |
| 266 | Getz et al. | 2022 | L2013600424 | outcome; no toxicity outcomes reported |
| 267 | Getz et al. | 2020 | L2007511591 | treatment; addition of other antineoplastic agent |
| 268 | Getz et al. | 2019 | L625764388 | treatment; addition of other antineoplastic agent |
| 269 | Ghadiany et al. | 2019 | 30770307 | outcome; no toxicity outcomes reported |
| 270 | Ghafoor et al. | 2020 | L2004463994 | outcome; no toxicity outcomes reported |
| 271 | Gibson et al. | 2011 | 21902686 | population; patients with Down syndrome and ALL included |
| 272 | Gibson et al. | 2005 | L41741605 | publication type; no original data |
| 273 | Giles et al. | 2005 | 15863204 | outcome; toxicity outcomes insufficiently specified |
| 274 | Giles et al. | 2003 | L46638583 | outcome; no toxicity outcomes reported |
| 275 | Gluckman et al. | 1973 | 4511906 | population; patients with APL included |
| 276 | Goldberg et al. | 1998 | L28092971 | treatment; no uniform treatment regimen |
| 277 | Goldstone et al. | 2001 | L35119593 | outcome; cardiotoxicity insufficiently specified |
| 278 | Gougounon et al. | 2011 | 21397944 | outcome; no toxicity outcomes reported |
| 279 | Graf et al. | 2023 | L2020905697 | outcome; toxicity outcomes insufficiently specified |
| 280 | Green et al. | 2021 | 33225799 | treatment; no uniform treatment regimen |
| 281 | Grier et al. | 1987 | L18056008 | outcome; toxicity outcomes (possibly) occurred during consolidation phase |
| 282 | Grier et al. | 1992 | L22174551 | outcome; toxicity outcomes insufficiently specified |
| 283 | Guo et al. | 2018 | 28910431 | treatment; no uniform treatment regimen |
| 284 | Guo et al. | 2011 | L361156360 | outcome; no toxicity outcomes reported |
| 285 | Gupta et al. | 2015 | L604958824 | treatment; no uniform treatment regimen |
| 286 | Gupta et al. | 2012 | L51713213 | outcome; toxicity outcomes insufficiently specified |
| 287 | Gyan et al. | 2022 | 35697729 | treatment; addition of other agent to induction therapy |
| 288 | Hadisantoso et al. | 2022 | 35721596 | outcome; no toxicity outcomes reported |
| 289 | Hann et al. | 1997 | L27143277 | outcome; toxicity outcomes (possibly) occurred during consolidation phase |
| 290 | Hansen et al. | 1995 | L25192139 | outcome; no cardiotoxicity reported |
| 291 | Harada et al. | 2018 | L619498936 | treatment; no uniform treatment regimen |
| 292 | Harb et al. | 2009 | L354692276 | outcome; no toxicity outcomes reported |
| 293 | Harousseau et al. | 1997 | 9376578 | outcome; toxicity outcomes insufficiently specified |
| 294 | Harousseau et al. | 1991 | 2072146 | outcome; toxicity reported during consolidation phase |
| 295 | Harousseau et al. | 1989 | 2917635 | treatment; wrong route of administration |
| 296 | Harousseau et al. | 2000 | L30106608 | outcome; toxicity outcomes (possibly) occurred during consolidation phase |
| 297 | Harris et al. | 1978 | 272913 | outcome; no toxicity outcomes reported |
| 298 | Hartmann et al. | 2001 | L32737181 | outcome; toxicity outcomes (possibly) occurred during consolidation phase |
| 299 | Hasegawa et al. | 2020 | 32886449 | treatment; no uniform treatment regimen |
| 300 | Hassanein et al. | 2013 | L52411805 | outcome; no toxicity outcomes reported |
| 301 | Hayakawa et al. | 2022 | L2015634897 | outcome; toxicity reported during consolidation phase |
| 302 | He et al. | 2003 | 12764371 | outcome; toxicity outcomes insufficiently specified |
| 303 | Heil et al. | 1997 | L28007183 | outcome; toxicity outcomes insufficiently specified |
| 304 | Heil et al. | 2004 | L38684445 | outcome; toxicity outcomes insufficiently specified |
| 305 | Heil et al. | 1995 | L26020528 | outcome; toxicity outcomes (possibly) occurred during consolidation phase |
| 306 | Hengeveld et al. | 2012 | L51936587 | outcome; toxicity outcomes (possibly) occurred during consolidation phase |
| 307 | Hernández-Boluda et al. | 2022 | L2017203844 | outcome; no toxicity outcomes reported |
| 308 | Heyll et al. | 1994 | 8038233 | treatment; regimen not according to ELN-2022 guidelines |
| 309 | Hicsönmez et al. | 1992 | 1592102 | treatment; unclear anthracycline dose based on body weight |
| 310 | Hofmann et al. | 2004 | 15156346 | treatment; regimen not according to ELN-2022 guidelines |
| 311 | Hong et al. | 2018 | L620196587 | treatment; addition of other antineoplastic agent |
| 312 | Horácek et al. | 2005 | L41406693 | outcome; cardiotoxicity outcomes insufficiently specified |
| 313 | Horácek et al. | 2008 | 18622008 | publication type; letter to the editor |
| 314 | Hou et al. | 2022 | L2013941757 | outcome; no toxicity outcomes reported |
| 315 | Hu et al. | 2020 | L2004582874 | outcome; adverse events not graded |
| 316 | Hu et al. | 2021 | L2011783747 | outcome; no cardiotoxicity reported |
| 317 | Huang et al. | 2012 | 21258877 | outcome; only cardiac rhythm AE's reported |
| 318 | Huang et al. | 2011 | L51311598 | outcome; toxicity outcomes (possibly) occurred during consolidation phase |
| 319 | Huang et al. | 2014 | L53169307 | outcome; toxicity reported during consolidation phase |
| 320 | Huang et al. | 2018 | L621563035 | outcome; cardiotoxicity outcomes insufficiently specified |
| 321 | Huang et al. | 2012 | L365038155 | treatment; no uniform treatment regimen |
| 322 | Huang et al. | 2024 | L2028946392 | treatment; addition of other antineoplastic agent |
| 323 | Hwang et al. | 1992 | 1449119 | outcome; no toxicity outcomes reported |
| 334 | Ibrahimova et al. | 2021 | L2010758122 | outcome; toxicity outcomes insufficiently specified |
| 325 | Iida et al. | 2022 | L2015138154 | outcome; no cardiotoxicity outcomes reported |
| 326 | Ikkala et al. | 1974 | L5046496 | outcome; no toxicity outcomes reported |
| 327 | Imamura et al. | 2012 | L52185508 | outcome; no toxicity outcomes reported |
| 328 | Inaba et al. | 2011 | L361401060 | outcome; toxicity outcomes insufficiently specified |
| 329 | Inaba et al. | 2012 | L52039635 | treatment; no uniform treatment regimen |
| 330 | Islam et al. | 2022 | 36194842 | outcome; toxicity outcomes insufficiently specified |
| 331 | Isnard et al. | 2001 | L32591187 | outcome; no toxicity outcomes reported |
| 332 | Issa et al. | 2020 | 32546726 | outcome; toxicity outcomes insufficiently specified |
| 333 | Itzykson et al. | 2011 | L361895660 | publication type; no original data |
| 334 | Jackson et al. | 2014 | L53078771 | outcome; no toxicity outcomes reported |
| 335 | Jacob et al. | 2019 | L625221064 | population; patients with APL included who received different treatment schedule |
| 336 | Jacobs et al. | 1984 | 6711556 | treatment; wrong anthracycline agent |
| 337 | Jacoby et al. | 2021 | 33974493 | publication type; letter to the editor |
| 338 | Jacquillat et al. | 1972 | 4510816 | population; patients with relapsed-/refractory disease included |
| 339 | Jaff et al. | 2007 | L44709753 | treatment; no uniform treatment regimen |
| 340 | Jaime-Pérez et al. | 2014 | L603693039 | treatment; no uniform treatment regimen |
| 341 | Jaime-Pérez et al. | 2023 | L2016739024 | treatment; various types of anthracycline agents used |
| 342 | Janvier et al. | 1984 | L14107217 | outcome; no toxicity outcomes reported |
| 343 | Jarfelt et al. | 2016 | 26383901 | outcome; long term follow-up |
| 344 | Jehn et al. | 2006 | 16932345 | outcome; toxicity reported during consolidation phase |
| 345 | Jehn et al. | 1994 | 8180607 | treatment; regimen not according to ELN-2022 guidelines |
| 346 | Jiménez-Hernández et al. | 2015 | 25821830 | outcome; toxicity outcomes insufficiently specified |
| 347 | Johnson et al. | 1988 | L19013284 | outcome; toxicity outcomes insufficiently specified |
| 348 | Jourdan et al. | 2005 | L40646900 | outcome; toxicity outcomes insufficiently specified |
| 349 | Jouzier et al. | 2021 | L2010962584 | outcome; toxicity outcomes insufficiently specified |
| 350 | Juliusson et al. | 2003 | L37533292 | treatment; addition of other antineoplastic agent |
| 351 | Kahl et al. | 2016 | L606536889 | outcome; toxicity outcomes insufficiently specified |
| 352 | Kakepoto et al. | 2002 | 12553679 | outcome; no toxicity outcomes reported |
| 353 | Kalaycio et al. | 2008 | 18756545 | outcome; no toxicity outcomes reported |
| 354 | Kang et al. | 2017 | 28231491 | outcome; toxicity outcomes insufficiently specified |
| 355 | Kang et al. | 2019 | L2004177165 | population; patients with ALL included |
| 356 | Kantarjian et al. | 2006 | 16435387 | treatment; no uniform treatment regimen |
| 357 | Kantarjian et al. | 2010 | L360040192 | outcome; no toxicity outcomes reported |
| 358 | Kantarjian et al. | 2007 | L46435392 | outcome; no toxicity outcomes reported |
| 359 | Kasner et al. | 2018 | 29607465 | treatment; addition of other antineoplastic agent |
| 360 | Kattih et al. | 2021 | 32948843 | outcome; toxicity outcomes insufficiently specified |
| 361 | Kavcic et al. | 2013 | L52461980 | outcome; toxicity outcomes insufficiently specified |
| 362 | Keating et al. | 1999 | L29454644 | outcome; toxicity outcomes insufficiently specified |
| 363 | Kennedy et al. | 2013 | L369041922 | outcome; no cardiotoxicity outcomes reported |
| 364 | Kersten et al. | 2013 | L370047225 | population; patients with ALL included |
| 365 | Khan et al. | 2020 | 31719680 | publication type; letter to the editor |
| 366 | Kikuchi et al. | 2012 | L52085290 | publication type; no original data |
| 367 | Killick et al. | 1999 | L29454407 | treatment; no uniform treatment regimen |
| 368 | Kim et al. | 2015 | 25944346 | outcome; no toxicity outcomes reported |
| 369 | Kim et al. | 2015 | L53229915 | outcome; no toxicity outcomes reported |
| 370 | Kim et al. | 2014 | L53229915 | outcome; no toxicity outcomes reported |
| 371 | Klein et al. | 2015 | L608170013 | treatment; no uniform treatment regimen |
| 372 | Klein et al. | 2020 | L2003922947 | treatment; no uniform treatment regimen |
| 373 | Klingler et al. | 2022 | L2018144889 | outcome; cardiovascular adverse events insufficiently specified |
| 374 | Knapper et al. | 2017 | L614740130 | publication type; no original data |
| 375 | Knauf et al. | 1994 | 8180605 | treatment; no cytarabine used |
| 376 | Knipp et al. | 2007 | L47121895 | outcome; no toxicity outcomes reported |
| 377 | Kobayashi et al. | 2013 | L369980716 | treatment; number of induction cycles unclear |
| 378 | Koh et al. | 2010 | 20587614 | outcome; no toxicity outcomes reported |
| 379 | Kolitz et al. | 2014 | L52944054 | treatment; addition of other antineoplastic agent |
| 380 | Kolitz et al. | 2010 | L359524923 | outcome; cardiotoxicity outcomes reported during consolidation phase |
| 381 | Kolitz et al. | 2020 | L2003731603 | outcome; toxicity outcomes (possibly) occurred during consolidation phase |
| 382 | Kolitz et al. | 2004 | 15514371 | treatment; regimen not according to ELN-2022 guidelines |
| 383 | Kolonen et al. | 2022 | L2017879257 | outcome; no cardiotoxicity reported |
| 384 | Kraft et al. | 1990 | 2182448 | treatment; addition of other antineoplastic agent |
| 385 | Krausset al. | 2019 | 30541745 | publication type; no original data |
| 386 | Krug et al. | 2016 | L608822616 | outcome; no toxicity outcomes reported |
| 387 | Kuptsova et al. | 2007 | L46641746 | treatment; no uniform treatment regimen |
| 388 | Kurrle et al. | 1988 | 3285914 | outcome; toxicity outcomes insufficiently specified |
| 389 | Kutlay et al. | 2003 | L36410983 | outcome; toxicity outcomes insufficiently specified |
| 390 | Lachowiez et al. | 2020 | L2005647438 | outcome; no toxicity outcomes reported |
| 391 | Lambert et al. | 2019 | 30076173 | outcome; toxicity outcomes possibly reported during consolidation phase |
| 392 | Lancet et al. | 2018 | L623801081 | outcome; toxicity outcomes insufficiently specified |
| 393 | Larson et al. | 2012 | 21913806 | population; patients with relapsed-/refractory disease included |
| 394 | Latagliata et al. | 2000 | 10784399 | treatment; unclear anthracycline dose |
| 395 | Latagliata et al. | 1995 | L25111327 | outcome; toxicity outcomes insufficiently specified |
| 396 | Latagliata et al. | 2008 | L352663153 | treatment; regimen not according to ELN-2022 guidelines |
| 397 | Lazarus et al. | 1989 | 2917307 | outcome; toxicity outcomes not graded |
| 398 | Lee et al. | 2012 | 21935651 | outcome; cardiotoxicity outcomes insufficiently specified |
| 399 | Lee et al. | 2016 | 26750985 | population; no baseline characteristics reported |
| 400 | Lee et al. | 2010 | L358433234 | outcome; no toxicity outcomes reported |
| 401 | Lee et al. | 1999 | L29415241 | outcome; toxicity outcomes insufficiently specified |
| 402 | Lee et al. | 2022 | 35760672 | outcome; no toxicity outcomes reported |
| 403 | Lee et al. | 2011 | 21828126 | outcome; toxicity outcomes insufficiently specified |
| 404 | Leger et al. | 2023 | L2027156201 | treatment; addition of other antineoplastic agent |
| 405 | Legg et al. | 2023 | 37544809 | outcome; no cardiotoxicity outcomes reported |
| 406 | Lehrnbecher et al. | 2007 | L46220636 | outcome; no cardiotoxicity outcomes reported |
| 407 | Leoni et al. | 1990 | L20043275 | outcome; no toxicity outcomes reported |
| 408 | Leoni et al. | 1995 | L25149965 | treatment; regimen not according to ELN-2022 guidelines |
| 409 | Li et al. | 2019 | L629979198 | treatment; no uniform treatment regimen |
| 410 | Liang et al. | 1995 | 7795271 | outcome; toxicity outcomes insufficiently specified |
| 411 | Liang et al. | 1990 | 2208581 | outcome; toxicity outcomes insufficiently specified |
| 412 | Lim et al. | 2015 | L605288568 | outcome; toxicity outcomes (possibly) occurred during consolidation phase |
| 413 | Lin et al. | 2013 | 22852586 | treatment; unclear treatment regimen |
| 414 | Lin et al. | 2019 | 31098682 | population and outcome; no toxicity reported |
| 415 | Lin et al. | 2021 | 33724305 | publication type; no original data |
| 416 | Lin et al. | 2021 | L2005528411 | treatment; regimen not according to ELN-2022 guidelines |
| 417 | Lindemalm et al. | 1978 | L9011953 | treatment; unclear anthracycline dose based on body weight |
| 418 | List et al. | 2001 | 11719356 | population; patients with relapsed-/refractory disease included |
| 419 | Liu et al. | 2012 | L364127189 | outcome; no toxicity outcomes reported |
| 420 | Liu et al. | 2019 | L2002693977 | outcome; no cardiotoxicity outcomes reported |
| 421 | Liu et al. | 2020 | L2004007220 | outcome; no cardiotoxicity reported |
| 422 | Liu et al. | 2018 | L625778065 | outcome; cardiotoxicity outcomes insufficiently specified |
| 423 | Liu et al. | 2017 | L618894608 | treatment; regimen not according to ELN-2022 guidelines |
| 424 | Liu et al. | 2017 | L612666938 | treatment; regimen not according to ELN-2022 guidelines |
| 425 | Lo et al. | 1989 | L19069389 | treatment; no uniform treatment regimen |
| 426 | Löfgren et al. | 2004 | 14984497 | outcome; toxicity reported during consolidation phase |
| 427 | Long et al. | 2020 | 31652239 | outcome; only long term cardiotoxicity outcomes reported |
| 428 | Loo et al. | 2023 | 37647654 | treatment; two different induction treatment regimens |
| 429 | Low et al. | 2013 | L368419361 | treatment; regimen not according to ELN-2022 guidelines |
| 430 | Löwenberg et al. | 1997 | 9376575 | outcome; toxicity outcomes not graded |
| 431 | Löwenberg et al. | 2021 | L2011277499 | outcome; toxicity outcomes insufficiently specified |
| 432 | Löwenberg et al. | 1997 | L27527723 | outcome; cardiotoxicity outcomes not sufficiently specified |
| 433 | Löwenberg et al. | 1998 | L28115455 | outcome; only reported on deaths in complete remission |
| 434 | Lowenthal et al. | 1999 | 10492073 | outcome; cardiotoxicity outcomes insufficiently specified |
| 435 | Lubieniecka et al. | 2012 | 23001242 | outcome; no toxicity outcomes reported |
| 436 | Luskin et al. | 2016 | L609210009 | outcome; no toxicity outcomes reported |
| 437 | Lv et al. | 2019 | L2001555138 | outcome; cardiotoxicity outcomes insufficiently specified |
| 438 | Ma et al. | 2009 | L355652511 | outcome; no toxicity outcomes reported |
| 439 | Mabed et al. | 2018 | L2000933290 | treatment; unclear treatment regimen |
| 440 | Mabrey et al. | 2020 | L2005379106 | outcome; toxicity outcomes insufficiently specified |
| 441 | MacCallum et al. | 1995 | 7632817 | outcome; toxicity outcomes insufficiently specified |
| 442 | Mandelli et al. | 2009 | 19826132 | outcome; toxicity outcomes insufficiently specified |
| 443 | Mandelli et al. | 1992 | L22163977 | outcome; toxicity outcomes insufficiently specified |
| 444 | Manoharan et al. | 1997 | L27305715 | outcome; toxicity outcomes insufficiently specified |
| 445 | Manoharan et al. | 2007 | L46978241 | outcome; toxicity outcomes insufficiently specified |
| 446 | Mantovani et al. | 2002 | L34202105 | outcome; toxicity outcomes insufficiently specified |
| 447 | Mao et al. | 2022 | 35039900 | treatment; unclear anthracycline dose |
| 448 | Mao et al. | 2020 | L2005730955 | treatment; no uniform treatment regimen |
| 449 | Marshalek et al. | 2024 | L2028471140 | outcome; no cardiotoxicity outcomes reported |
| 450 | Martinéz-Cuadrón et al. | 2024 | 37199127 | outcome; no cardiotoxicity outcomes reported |
| 451 | Martí­nez-Cuadrón et al. | 2021 | L2007009103 | outcome; toxicity outcomes insufficiently specified |
| 452 | Matthews et al. | 2023 | 37334852 | outcome; toxicity outcomes insufficiently specified |
| 453 | Matthews et al. | 2022 | 35507945 | outcome; toxicity outcomes insufficiently specified |
| 454 | Maurillo et al. | 2018 | 29947973 | outcome; toxicity outcomes insufficiently specified |
| 455 | Mawad et al. | 2013 | L372705781 | outcome; toxicity outcomes (possibly) occurred during consolidation phase |
| 456 | Mayer et al. | 1994 | 8078551 | outcome; toxicity outcomes insufficiently specified |
| 457 | McHayleh et al. | 2009 | 19860628 | treatment; multiple anthracycline agents during induction therapy |
| 458 | McMillan et al. | 1990 | 2378981 | treatment; addition of other antineoplastic agent |
| 459 | Meena et al. | 2022 | L2019074025 | outcome; toxicity outcomes insufficiently specified |
| 460 | Megí­as-Vericat et al. | 2021 | 33135528 | publication type; no original study data |
| 461 | Megí­as-Vericat et al. | 2021 | 33675324 | publication type; no original data |
| 462 | Megí­as-Vericat et al. | 2017 | 28570300 | outcome; toxicity outcomes insufficiently specified |
| 463 | Megí­as-Vericat et al. | 2017 | L612619806 | treatment; addition of other antineoplastic agent |
| 464 | Mehta et al. | 1999 | L29429737 | outcome; no cardiotoxicity outcomes reported |
| 465 | Michalski et al. | 2019 | L628448160 | treatment; addition of other antineoplastic agent |
| 466 | Michel et al. | 1996 | 8931998 | outcome; toxicity outcomes insufficiently specified |
| 467 | Michels et al. | 1989 | L19282853 | outcome; no toxicity outcomes reported |
| 468 | Militaru et al. | 2018 | L625081701 | outcome; cardiotoxicity outcomes reported during consolidation phase |
| 469 | Miller et al. | 2022 | L2019962602 | outcome; no cardiotoxicity outcomes reported |
| 470 | Milligan et al. | 2006 | 16484584 | outcome; toxicity outcomes insufficiently specified |
| 471 | Min et al. | 2022 | L2017258957 | outcome; no cardiotoxicity reported |
| 472 | Minakata et al. | 2016 | L607683877 | treatment; no uniform treatment regimen |
| 473 | Mitus et al. | 1995 | 7884416 | outcome; toxicity outcomes insufficiently specified |
| 474 | Miyamoto et al. | 2018 | L619764815 | outcome; toxicity outcomes insufficiently specified |
| 475 | Miyawaki et al. | 2005 | 16284985 | outcome; toxicity reported during consolidation phase |
| 476 | Miyawaki et al. | 2011 | L361348803 | outcome; toxicity outcomes (possibly) occurred during consolidation phase |
| 477 | Möllgard et al. | 1998 | L28544293 | outcome; cardiotoxicity outcomes not graded |
| 478 | Moore et al. | 1997 | 9028308 | outcome; toxicity outcomes insufficiently specified |
| 479 | Moore et al. | 2005 | L40628181 | outcome; toxicity outcomes (possibly) occurred during consolidation phase |
| 480 | Mort et al. | 2020 | 31500517 | treatment; unclear treatment regimen |
| 481 | Mossallam et al. | 2006 | 17671537 | outcome; toxicity outcomes insufficiently specified |
| 482 | Mrózek et al. | 1997 | 9373264 | outcome; no toxicity outcomes reported |
| 483 | Müller-Tidow et al. | 2016 | 26522083 | outcome; toxicity outcomes possibly reported during consolidation phase |
| 484 | Nagarajan et al. | 2019 | L2002399168 | outcome; no cardiotoxicity outcomes reported |
| 485 | Namratha et al. | 2020 | L631797975 | outcome; no toxicity outcomes reported |
| 486 | Naparstek et al. | 1985 | 3923761 | treatment; addition of other antineoplastic agent |
| 487 | Nel et al. | 1996 | 8960144 | outcome; toxicity outcomes possibly reported during consolidation phase |
| 488 | Niederwieser et al. | 2023 | 36695874 | outcome; no toxicity outcomes reported |
| 489 | Nikanfar et al. | 2007 | L350242026 | outcome; no toxicity outcomes reported |
| 490 | Norsworthy et al. | 2017 | L618061990 | treatment; no uniform treatment regimen |
| 491 | Nousiainen et al. | 1998 | L28551685 | treatment; addition of other antineoplastic agent |
| 492 | Novitzky et al. | 2004 | L38988615 | treatment; regimen not according to ELN-2022 guidelines |
| 493 | O'Brien et al. | 2002 | 12351376 | treatment; addition of other antineoplastic agent |
| 494 | Oh et al. | 2017 | L617962807 | outcome; no toxicity outcomes reported |
| 495 | Ohtake et al. | 2011 | 20693429 | outcome; toxicity outcomes possibly reported during consolidation phase |
| 496 | Ohtake et al. | 2010 | 20054669 | outcome; no toxicity outcomes reported |
| 497 | Oliva et al. | 2023 | L2023180581 | treatment; regimen not according to ELN-2022 guidelines |
| 498 | Omura et al. | 1982 | 7039813 | outcome; toxicity outcomes insufficiently specified |
| 499 | Oosterveld et al. | 2002 | 12200672 | outcome; no toxicity outcomes reported |
| 500 | Orgel et al. | 2013 | L369358844 | treatment; addition of other antineoplastic agent |
| 501 | Ossenkoppele et al. | 2020 | L2004197306 | outcome; toxicity outcomes insufficiently specified |
| 502 | Ossenkoppele et al. | 2012 | L366219965 | outcome; toxicity outcomes insufficiently specified |
| 503 | Ost et al. | 1984 | 6591386 | outcome; no toxicity outcomes reported |
| 504 | Ostgard et al. | 2015 | L606861395 | outcome; no toxicity outcomes reported |
| 505 | Othman et al. | 2023 | 37171402 | outcome; toxicity outcomes insufficiently specified |
| 506 | Othus et al. | 2019 | 30315233 | outcome; no toxicity outcomes reported |
| 507 | Othus et al. | 2023 | 35833298 | outcome; no toxicity outcomes reported |
| 508 | Othus et al. | 2019 | 30315234 | outcome; no toxicity outcomes reported |
| 509 | Othus et al. | 2014 | L52668223 | outcome; no toxicity outcomes reported |
| 510 | Pabst et al. | 2012 | L365038150 | outcome; toxicity outcomes insufficiently specified |
| 511 | Paciucci et al. | 1997 | L127334705 | outcome; toxicity outcomes (possibly) occurred during consolidation phase |
| 512 | Pagel et al. | 2020 | L2006740711 | outcome; toxicity outcomes (possibly) occurred during consolidation phase |
| 513 | Palmieri et al. | 2002 | 12007501 | outcome; toxicity outcomes insufficiently specified |
| 514 | Palmieri et al. | 2006 | L43985252 | treatment; addition of other antineoplastic agent |
| 515 | Papageorgiou et al. | 2005 | L40942682 | outcome; no cardiotoxicity reported |
| 516 | Parovichnikova et al. | 2018 | 30701918 | language; non-English written article |
| 517 | Pasvolskyet al. | 2019 | 30948329 | treatment; unclear anthracycline dose |
| 518 | Patel et al. | 2012 | 22417203 | outcome; no toxicity outcomes reported |
| 519 | Paton et al. | 1982 | 6762195 | treatment; addition of other antineoplastic agent |
| 520 | Paul et al. | 1981 | 7023715 | outcome; toxicity reported during consolidation phase |
| 521 | Paul et al. | 1991 | L21113549 | treatment; unclear anthracycline dose based on body weight |
| 522 | Pautas et al. | 2010 | 20048183 | outcome; toxicity outcomes insufficiently specified |
| 523 | Pavlovsky et al. | 1994 | L24255442 | outcome; toxicity outcomes possibly reported during consolidation phase |
| 524 | Perel et al. | 2004 | 15124700 | outcome; no toxicity outcomes reported |
| 525 | Perel et al. | 2002 | 12065553 | outcome; toxicity outcomes insufficiently specified |
| 526 | Perel et al. | 2005 | L41741600 | outcome; toxicity outcomes insufficiently specified |
| 527 | Peric et al. | 2015 | L601042713 | outcome; toxicity outcomes insufficiently specified |
| 528 | Pession et al. | 2013 | L370294696 | outcome; no toxicity outcomes reported |
| 529 | Peterlin et al. | 2023 | 37245522 | population; patients with CMML included |
| 530 | Petersdorf et al. | 2013 | L617279109 | outcome; toxicity outcomes incoherently specified |
| 531 | Petersdorf et al. | 2007 | 17696203 | outcome; toxicity outcomes insufficiently specified |
| 532 | Peterson et al. | 1977 | 890652 | treatment; addition of other antineoplastic agent |
| 533 | Phillips et al. | 2010 | L359269406 | treatment; addition of other antineoplastic agent |
| 534 | Phillips et al. | 1991 | 2009367 | outcome; toxicity outcomes insufficiently specified |
| 535 | Pigneux et al. | 2010 | 20479424 | outcome; toxicity outcomes insufficiently specified |
| 536 | Pigneux et al. | 2007 | 18024370 | outcome; toxicity outcomes insufficiently specified |
| 537 | Pigneux et al. | 2018 | L624797099 | outcome; toxicity outcomes insufficiently specified |
| 538 | Pignon et al. | 1996 | L26247992 | treatment; regimen not according to ELN-2022 guidelines |
| 539 | Pluta et al. | 2017 | 28103640 | outcome; toxicity outcomes insufficiently specified |
| 540 | Pogliani et al. | 1995 | 8590849 | outcome; toxicity outcomes insufficiently specified |
| 541 | Portugal et al. | 2017 | 28842139 | outcome; toxicity outcomes insufficiently specified |
| 542 | Poth et al. | 1972 | 4508367 | treatment; unclear anthracycline dose based on body weight |
| 543 | Powles et al. | 1973 | 4531352 | outcome; no toxicity outcomes reported |
| 544 | Pratz et al. | 2023 | 37379495 | treatment; addition of other antineoplastic agent |
| 545 | Prebet et al. | 2014 | 24972769 | publication type; letter to the editor |
| 546 | Preisler et al. | 1987 | 3552076 | outcome; toxicity outcomes insufficiently specified |
| 547 | Preisler et al. | 1982 | 6983831 | outcome; no toxicity outcomes reported |
| 548 | Preisler et al. | 1991 | 1751366 | outcome; cardiotoxicity outcomes not graded |
| 549 | Preisler et al. | 1986 | 3460626 | treatment; no uniform treatment regimen |
| 550 | Preisler et al. | 1979 | 760861 | treatment; no uniform treatment regimen |
| 551 | Przespolewski et al. | 2023 | 36493344 | publication type; letter to the editor |
| 552 | Pulsoni et al. | 2004 | L38788413 | treatment; no uniform treatment regimen |
| 553 | Qi et al. | 2020 | L2006750776 | outcome; toxicity outcomes insufficiently specified |
| 554 | Qian et al. | 2007 | L47212427 | outcome; toxicity outcomes insufficiently specified |
| 555 | Qin et al. | 2015 | L607029116 | outcome; no toxicity outcomes reported |
| 556 | Quah et al. | 1996 | L26087826 | population; patients with ALL included |
| 557 | Quesnel et al. | 1993 | L23353966 | treatment; no uniform treatment regimen |
| 558 | Quintás-Cardama et al. | 2012 | L366219967 | treatment; no uniform treatment regimen |
| 559 | Radhakrishnan et al. | 2016 | L606084182 | outcome; no toxicity outcomes reported |
| 560 | Rai et al. | 1981 | 6946847 | population; inclusion of patients with APL |
| 561 | Raluca et al. | 2018 | 30722121 | population; patients with ALL included |
| 562 | Rascheet al. | 2018 | 29550834 | publication type; no original data |
| 563 | Rautenberg et al. | 2021 | L2013861186 | outcome; no cardiotoxicity reported |
| 564 | Razzouk et al. | 2001 | L32785301 | publication type; no original data |
| 565 | Reagan et al. | 2015 | 26045177 | outcome; no toxicity outcomes reported |
| 566 | Récher et al. | 2014 | 24166215 | publication type; letter to the editor |
| 567 | Récher et al. | 2022 | L2014241708 | outcome; no toxicity outcomes reported |
| 568 | Reece et al. | 1993 | 8402219 | population; patients with relapsed-/refractory disease included |
| 569 | Reiffers et al. | 1980 | 6929722 | treatment; unclear anthracycline dose |
| 570 | Ribeiro et al. | 2005 | L41741604 | outcome; toxicity outcomes insufficiently specified |
| 571 | Riley et al. | 1999 | 10460604 | treatment; addition of other antineoplastic agent |
| 572 | Rizzieri et al. | 2009 | L354825562 | outcome; no toxicity outcomes reported |
| 573 | Roboz et al. | 2012 | L51852235 | outcome; no toxicity outcomes reported |
| 574 | Rodrigues et al. | 2003 | L36874720 | treatment; no uniform treatment regimen |
| 575 | Roggli et al. | 1981 | 6944145 | outcome; no toxicity outcomes reported |
| 576 | Röllig et al. | 2015 | L607220829 | outcome; toxicity possibly reported during consolidation phase |
| 577 | Röllig et al. | 2021 | L2010529587 | outcome; no toxicity outcomes reported |
| 578 | Röllig et al. | 2018 | 29390048 | outcome; toxicity outcomes possibly reported during consolidation phase |
| 579 | Ross et al. | 2015 | L604997378 | treatment; no uniform treatment regimen |
| 580 | Rotstein et al. | 1999 | L29241223 | treatment; no uniform treatment regimen |
| 581 | Rowe et al. | 1995 | L25218767 | outcome; toxicity outcomes insufficiently specified |
| 582 | Rowe et al. | 2004 | L38140076 | outcome; no toxicity outcomes reported |
| 583 | Rubnitz et al. | 2010 | L50901603 | outcome; no toxicity outcomes reported |
| 584 | Rubnitz et al. | 2019 | L2002607424 | outcome; toxicity outcomes possibly reported during consolidation phase |
| 585 | Rubnitz et al. | 2012 | L52050780 | treatment; addition of other antineoplastic agent |
| 586 | Rühl et al. | 1981 | 6947118 | outcome; no toxicity outcomes reported |
| 587 | Ruiz-Mori et al. | 2019 | L2001226224 | language; non-English written article |
| 588 | Russell et al. | 2022 | L2014441069 | outcome; no toxicity outcomes reported |
| 589 | Russo et al. | 2002 | 12224004 | population; patients with relapsed-/refractory disease included |
| 590 | Russo et al. | 2005 | 16197446 | outcome; toxicity outcomes insufficiently specified |
| 591 | Ruutu et al. | 1997 | 9112430 | outcome; toxicity outcomes insufficiently specified |
| 592 | Ryan et al. | 1992 | 1550082 | treatment; regimen not according to ELN-2022 guidelines |
| 593 | Sackmann-Muriel et al. | 1996 | 9009256 | population; patients with Down’s syndrome included |
| 594 | Sahasrabudhe et al. | 2022 | L2019599137 | outcome; no toxicity outcomes reported |
| 595 | Saiki et al. | 1993 | 8262731 | population; patients with ALL included |
| 596 | Saini et al. | 2019 | L625370313 | population; same study population as other included study |
| 597 | Salhotra et al. | 2021 | 33719090 | publication type; letter to the editor |
| 598 | Sanchez Mejia et al. | 2023 | L2021079343 | population; patients with other cancer types included |
| 599 | Sanchez-Petitto et al. | 2024 | L2030801019 | outcome; no cardiotoxicity outcomes reported |
| 600 | Sandes et al. | 2011 | 21915480 | outcome; no toxicity outcomes reported |
| 601 | Sandler et al. | 1997 | L27089891 | treatment; addition of other antineoplastic agent |
| 602 | Santo et al. | 2017 | L614389496 | outcome; no toxicity outcomes reported |
| 603 | Sartori et al. | 1993 | L23018169 | outcome; no cardiotoxicity outcomes reported |
| 604 | Sasaki et al. | 2019 | L628705912 | outcome; no toxicity outcomes reported |
| 605 | Sauter et al. | 1987 | 3305207 | outcome; no toxicity outcomes reported |
| 606 | Savani et al. | 2024 | 37889285 | publication type; letter to the editor |
| 607 | Savoie et al. | 2006 | 16497826 | treatment; no uniform treatment regimen |
| 608 | Schaich et al. | 2013 | 23630210 | outcome; toxicity data from consolidation phase |
| 609 | Schaich et al. | 2011 | 21606413 | outcome; toxicity reported during consolidation phase |
| 610 | Schaich et al. | 2011 | 21606413 | outcome; toxicity outcomes (possibly) occurred during consolidation phase |
| 611 | Schiffer et al. | 2000 | L30210530 | outcome; toxicity outcomes insufficiently specified |
| 612 | Schiller et al. | 1994 | 7858506 | treatment; addition of other antineoplastic agent |
| 613 | Schiller et al. | 1992 | 1467513 | outcome; toxicity reported during consolidation phase |
| 614 | Schiller et al. | 1997 | 9305609 | outcome; toxicity outcomes (possibly) occurred during consolidation phase |
| 615 | Schiller et al. | 2001 | 11368436 | outcome; toxicity outcomes (possibly) occurred during consolidation phase |
| 616 | Schlenk et al. | 2019 | 30728457 | treatment; regimen not according to ELN-2022 guidelines |
| 617 | Schlenk et al. | 2016 | L612518898 | treatment; regimen not according to ELN-2022 guidelines |
| 618 | Schlenk et al. | 2004 | L39534320 | treatment; regimen not according to ELN-2022 guidelines |
| 619 | Schlenk et al. | 2003 | L36986953 | outcome; toxicity outcomes (possibly) occurred during consolidation phase |
| 620 | Schloemer et al. | 2017 | L617020187 | treatment; no uniform treatment regimen |
| 621 | Schwarer et al. | 2019 | L629168806 | outcome; no toxicity outcomes reported |
| 622 | Schweitzer et al. | 2015 | L611695279 | outcome; no toxicity outcomes reported |
| 623 | Sechaud et al. | 2022 | L2018026818 | outcome; toxicity outcomes insufficiently specified |
| 624 | Seipelt et al. | 1998 | L28224843 | outcome; toxicity outcomes (possibly) occurred during consolidation phase |
| 625 | Seiter et al. | 2006 | 16396765 | outcome; toxicity outcomes insufficiently specified, no grading system used |
| 626 | Sekeris et al. | 2023 | 37604981 | outcome; no cardiotoxicity outcomes reported |
| 627 | Seligson et al. | 2018 | L621306914 | outcome; no cardiotoxicity outcomes reported |
| 628 | Seymour et al. | 2017 | L620353180 | outcome; no cardiotoxicity outcomes reported |
| 629 | Seymour et al. | 2017 | L612702639 | outcome; no uniform treatment schedule |
| 630 | Shaaban et al. | 2022 | L2020268201 | publication type; abstract |
| 631 | Shacham-Abulafia et al. | 2015 | L606317866 | outcome; cardiotoxicity outcomes not graded |
| 632 | Shadman et al. | 2015 | L604449245 | outcome; no cardiotoxicity reported |
| 633 | Shaikh et al. | 2021 | 34487660 | outcome; no toxicity outcomes reported |
| 634 | Shapiro et al. | 1997 | L27306097 | outcome; no cardiotoxicity outcomes reported |
| 635 | Shastri et al. | 2024 | L643214296 | outcome; no cardiotoxicity outcomes reported |
| 636 | Shatilova et al. | 2022 | L2020267848 | publication type; conference abstract |
| 637 | Shen et al. | 2023 | L2023092181 | outcome; toxicity outcomes (possibly) occurred during consolidation phase |
| 638 | Sherif et al. | 2021 | L2015028318 | outcome; cardiotoxicity not graded |
| 639 | Shi et al. | 2013 | 23252945 | outcome; adverse events not graded |
| 640 | Shi et al. | 2020 | L2004837525 | outcome; toxicity outcomes insufficiently specified |
| 641 | Shibuya et al. | 1990 | 2179636 | outcome; no toxicity outcomes reported |
| 642 | Shimony et al. | 2024 | 38378841 | treatment; unclear treatment regimen |
| 643 | Siemens et al. | 2023 | L2024544422 | population; patients with other cancer types included |
| 644 | Sierra et al. | 2008 | L352094356 | outcome; toxicity outcomes insufficiently specified |
| 645 | Sierra et al. | 2023 | 37581981 | treatment; addition of other antineoplastic agent |
| 646 | Sierra et al. | 1996 | 8648394 | treatment; regimen not according to ELN-2022 guidelines |
| 647 | Sirohi et al. | 2008 | 19052975 | outcome; no toxicity outcomes reported |
| 648 | Sitges et al. | 2020 | L2005233545 | outcome; toxicity outcomes insufficiently specified |
| 649 | Slats et al. | 2005 | L40521157 | treatment; no uniform treatment regimen |
| 650 | Solary et al. | 2003 | 12663440 | outcome; toxicity outcomes insufficiently specified |
| 651 | Solh et al. | 2020 | L2005099013 | outcome; no toxicity outcomes reported |
| 652 | Spataro et al. | 2000 | 11342335 | treatment; no uniform treatment regimen |
| 653 | Sperr et al. | 2004 | L38812469 | outcome; toxicity outcomes (possibly) occurred during consolidation phase |
| 654 | Stahl et al. | 2023 | 37451200 | treatment; unclear anthracycline dose |
| 655 | Stasi et al. | 1994 | 8123853 | treatment; no uniform treatment regimen |
| 656 | Stasi et al. | 1996 | 8640696 | treatment; no uniform treatment regimen |
| 657 | Stein et al. | 2000 | 10914541 | outcome; toxicity outcomes insufficiently specified |
| 658 | Stein et al. | 1996 | 9021690 | outcome; toxicity reported during consolidation phase |
| 659 | Stein et al. | 1984 | 6430063 | treatment; addition of lithium to induction therapy |
| 660 | Stein et al. | 1990 | 2259226 | outcome; toxicity outcomes not graded |
| 661 | Stein et al. | 2001 | 11697646 | outcome; no toxicity outcomes reported |
| 662 | Stevens et al. | 1998 | L28197786 | outcome; cardiotoxicity outcomes reported during consolidation phase |
| 663 | Stone et al. | 2015 | L603620136 | outcome; toxicity outcomes insufficiently specified |
| 664 | Stone et al. | 2008 | 18756547 | outcome; toxicity reported during consolidation phase |
| 665 | Stone et al. | 1995 | L25181502 | outcome; only grade 4+5 cardiotoxicity outcomes reported |
| 666 | Stone et al. | 2001 | L35119707 | outcome; toxicity outcomes (possibly) occurred during consolidation phase |
| 667 | Stone et al. | 2017 | L617606310 | outcome; toxicity outcomes insufficiently specified |
| 668 | Strasser-Weippl et al. | 2012 | L52047705 | outcome; no toxicity outcomes reported |
| 669 | Subari et al. | 2016 | 26781617 | outcome; no toxicity outcomes reported |
| 670 | Summerfield et al. | 1979 | L10204792 | outcome; no toxicity outcomes reported |
| 671 | Sung et al. | 2020 | L2004505315 | outcome; no cardiotoxicity outcomes reported |
| 672 | Sutter et al. | 2023 | L2023161145 | outcome; toxicity outcomes insufficiently specified |
| 673 | Suzushima et al. | 2010 | L50634567 | outcome; toxicity outcomes insufficiently specified |
| 674 | Tabori et al. | 2008 | L350234259 | outcome; toxicity outcomes insufficiently specified |
| 675 | Taguchi et al. | 2000 | L30821580 | outcome; toxicity outcomes (possibly) occurred during consolidation phase |
| 676 | Takahashi et al. | 1986 | 3461685 | treatment; patient flow insufficiently specified |
| 677 | Takahashi et al. | 2016 | L607428991 | outcome; toxicity outcomes insufficiently specified |
| 678 | Talati et al. | 2020 | 31073071 | outcome; no toxicity outcomes reported |
| 679 | Tamura et al. | 1983 | L13093944 | treatment; no uniform treatment regimen |
| 680 | Tan et al. | 2007 | 16602120 | treatment; no uniform treatment regimen |
| 681 | Tang et al. | 2011 | 21509439 | treatment; addition of other antineoplastic agent |
| 682 | Tasaki et al. | 2014 | L600790296 | outcome; no toxicity outcomes reported |
| 683 | Tefferi et al. | 2022 | 35734931 | publication type; letter to the editor |
| 684 | Temming et al. | 2011 | L361219929 | treatment; no uniform treatment regimen |
| 685 | Thomas et al. | 2007 | 17339189 | outcome; toxicity reported during consolidation phase |
| 686 | Thomas et al. | 2017 | L615250539 | outcome; toxicity outcomes (possibly) occurred during consolidation phase |
| 687 | Thomas et al. | 2011 | L362381176 | outcome; toxicity outcomes (possibly) occurred during consolidation phase |
| 688 | Thomas et al. | 2007 | L46306556 | treatment; multiple anthracycline agents used during induction therapy |
| 689 | Tilly et al. | 1990 | L20056558 | treatment; wrong treatment schedule |
| 690 | Tomizawa et al. | 2013 | 23677335 | publication type; letter to the editor |
| 691 | Tomizawa et al. | 2013 | L372187464 | population; patient characteristics insufficiently specified |
| 692 | Toro et al. | 2023 | L2026987515 | population; patients with other cancer types included |
| 693 | Tricot et al. | 1986 | L16033567 | treatment; no uniform treatment regimen |
| 694 | Trifilio et al. | 2013 | L52609546 | treatment; unclear anthracycline type |
| 695 | Tsimberidou et al. | 2003 | 12655529 | outcome; no toxicity outcomes reported |
| 696 | Tsukimoto et al. | 2009 | L358295058 | outcome; no toxicity outcomes reported |
| 697 | Tu et al. | 2016 | L612579316 | population; baseline characteristics of AML population not available |
| 698 | Tzogani et al. | 2020 | L2004647822 | publication type; no original data |
| 699 | Uchida et al. | 2023 | 36881060 | outcome; toxicity outcomes insufficiently specified |
| 700 | Udén et al. | 1975 | 1058527 | treatment; unclear anthracycline dose based on body weight |
| 701 | Ullah et al. | 2007 | L351235449 | outcome; toxicity outcomes insufficiently specified |
| 702 | Urabe et al. | 1993 | L23246571 | treatment; addition of other antineoplastic agent |
| 703 | Usui et al. | 2002 | L36786179 | treatment; regimen not according to ELN-2022 guidelines |
| 704 | Usui et al. | 1998 | L28265045 | treatment; addition of other antineoplastic agent |
| 705 | Usuki et al. | 2007 | L46193291 | outcome; toxicity outcomes insufficiently specified |
| 706 | Usuki et al. | 2024 | 38015362 | outcome; no cardiotoxicity outcomes reported |
| 707 | Vachhani et al. | 2018 | 30445237 | outcome; no toxicity outcomes reported |
| 708 | Vaezi et al. | 2017 | L606644162 | outcome; toxicity outcomes insufficiently specified |
| 709 | Valent et al. | 1992 | L23905195 | outcome; no cardiotoxicity outcomes reported |
| 710 | Van Sloten et al. | 1983 | L13129020 | outcome; toxicity outcomes insufficiently specified |
| 711 | Van Weelderen et al. | 2022 | L2014278284 | outcome; toxicity outcomes insufficiently specified |
| 712 | Van Weelderen et al. | 2023 | L2023945572 | outcome; toxicity outcomes insufficiently specified |
| 713 | Varadarajan et al. | 2012 | 21520043 | treatment; addition of other antineoplastic agent |
| 714 | Vaughan et al. | 1980 | 6942904 | outcome; toxicity outcomes insufficiently specified |
| 715 | Vaughan et al. | 1984 | L15212035 | outcome; toxicity outcomes (possibly) occurred during consolidation phase |
| 716 | Vehreschild et al. | 2007 | L47628350 | outcome; no cardiotoxicity reported |
| 717 | Vellenga et al. | 2011 | 21951683 | outcome; toxicity outcomes (possibly) occurred during consolidation phase |
| 718 | Venditti et al. | 2019 | L2002953208 | outcome; toxicity outcomes insufficiently specified |
| 719 | Veneri et al. | 2002 | L34297556 | treatment; addition of other antineoplastic agent |
| 720 | Visani et al. | 1999 | 10482929 | outcome; no toxicity outcomes reported |
| 721 | Visani et al. | 1995 | 8590845 | outcome; toxicity outcomes insufficiently specified |
| 722 | Visani et al. | 2001 | 11477440 | outcome; toxicity outcomes insufficiently specified |
| 723 | Vogler et al. | 1984 | 6201211 | outcome; toxicity outcomes insufficiently specified |
| 724 | Von dem Borne et al. | 2016 | L610051297 | treatment; no uniform treatment regimen |
| 725 | Von Lilienfeld-Toal et al. | 2007 | L350248260 | publication type; letter to the editor |
| 726 | Vulaj et al. | 2018 | L2000872902 | outcome; toxicity outcomes insufficiently specified |
| 727 | Wahlin et al. | 1997 | 9186533 | treatment; no uniform treatment regimen |
| 728 | Wahlin et al. | 1991 | 1934252 | treatment; unclear anthracycline dose |
| 729 | Wakita et al. | 2012 | 22639053 | outcome; toxicity outcomes insufficiently specified |
| 730 | Walter et al. | 2018 | 29242304 | publication type; letter to the editor |
| 731 | Walters et al. | 1987 | 3474052 | treatment; unclear anthracycline dose, various regimens used |
| 732 | Wang et al. | 2020 | 31959790 | treatment; unclear treatment regimen |
| 733 | Wang et al. | 2023 | L2021279835 | outcome; no cardiotoxicity outcomes reported |
| 734 | Wass et al. | 2016 | L612655973 | outcome; toxicity outcomes insufficiently specified |
| 735 | Wattel et al. | 1998 | 9734653 | outcome; toxicity outcomes insufficiently specified |
| 736 | Weick et al. | 1996 | L26357364 | outcome; toxicity outcomes insufficiently specified |
| 737 | Wells et al. | 2001 | 11477115 | outcome; no toxicity outcomes reported |
| 738 | Wells et al. | 1994 | 7964952 | outcome; toxicity outcomes insufficiently specified |
| 739 | Wetzler et al. | 2014 | L372289201 | treatment; no uniform treatment regimen |
| 740 | White et al. | 2018 | L624001014 | outcome; no toxicity outcomes reported |
| 741 | Whittaker et al. | 1980 | 7000149 | treatment; unclear anthracycline dose based on body weight |
| 742 | Whittaker et al. | 1977 | 322696 | treatment; unclear anthracycline dose based on body weight |
| 743 | Wiernik et al. | 1992 | L22068275 | outcome; cardiotoxicity outcomes insufficiently specified |
| 744 | Willemze et al. | 2014 | 24297940 | outcome; toxicity outcomes insufficiently specified |
| 745 | Witz et al. | 1998 | 9531581 | outcome; toxicity outcomes insufficiently specified |
| 746 | Wolff et al. | 1989 | 2769327 | treatment; no uniform treatment regimen |
| 747 | Wolff et al. | 1985 | 3995177 | treatment; no uniform treatment regimen |
| 748 | Woods et al. | 1990 | L20310646 | outcome; toxicity outcomes (possibly) occurred during consolidation phase |
| 749 | Xu et al. | 2010 | L360138735 | treatment; addition of other antineoplastic agent |
| 750 | Yalcin et al. | 1996 | L27037542 | outcome; no cardiotoxicity outcomes reported |
| 751 | Yalniz et al. | 2019 | 31237017 | outcome; no toxicity outcomes reported |
| 752 | Yates et al. | 1982 | L12048693 | outcome; toxicity outcomes insufficiently specified |
| 753 | Yi et al. | 2014 | L373421930 | outcome; no toxicity outcomes reported |
| 754 | Yohannan et al. | 2022 | L2020268214 | publication type; abstract |
| 755 | Yoon et al. | 2013 | 23983148 | outcome; no toxicity outcomes reported |
| 756 | Yoon et al. | 2017 | L618480067 | outcome; no toxicity outcomes reported |
| 757 | Yoshida et al. | 2022 | L2015575453 | outcome; no toxicity outcomes reported |
| 758 | Yoshida et al. | 2001 | L32012979 | outcome; no toxicity outcomes reported |
| 759 | Yu et al. | 2023 | 38031921 | outcome; no cardiotoxicity outcomes reported |
| 760 | Yunis et al. | 2023 | L2019878211 | outcome; toxicity outcomes insufficiently specified |
| 761 | Zeidner et al. | 2015 | 26022709 | treatment; multiple anthracycline agents during induction therapy |
| 762 | Zeidner et al. | 2018 | 30118897 | publication type; letter to the editor |
| 763 | Zhai et al. | 2011 | L361690276 | treatment; no uniform treatment regimen |
| 764 | Zhang et al. | 2022 | L2020075883 | treatment; no uniform treatment regimen |
| 765 | Zhang et al. | 2023 | L2024774383 | treatment; various types of anthracycline agents used |
| 766 | Zheng et al. | 2020 | L2005455998 | outcome; no cardiotoxicity outcomes reported |
| 767 | Zhong et al. | 2023 | L2023964107 | treatment; unclear treatment regimen |
| 768 | Zhong et al. | 2009 | 19635200 | outcome; cardiotoxicity outcomes insufficiently specified |
| 769 | Zhou et al. | 2016 | L608756412 | outcome; cardiotoxicity outcomes insufficiently specified |
| 770 | Zhou et al. | 2023 | 37833648 | population; patients with ALL included |
| 771 | Zittoun et al. | 1996 | L26230119 | outcome; cardiotoxicity outcomes possibly occurred during consolidation phase |
| 772 | Zittoun et al. | 1995 | L25034996 | outcome; no toxicity outcomes reported |

**4 - Study characteristics**

| Ref | Author | Year | Study type | Sample size | Age (years)* | Female (%) | Anthracycline agent | Range of cumulative anthracycline dose (mg/m2) | Traditional 7+3 induction protocol† | LVEF monitoring | Toxicity grading system |
| --- | --- | --- | --- | --- | --- | --- | --- | --- | --- | --- | --- |
| 1 | Abou-Jawde et al.S1 | 2006 | Single-arm trial | 40 | 68 | 40 | Mitoxantrone | 36 – 60 | Yes | No | None reported |
| 2 | Beksac M.S2 | 1998 | RCT | 34 | 41 | 35 | Idarubicin | 36 – 72 | Yes | No | WHO |
| 29 | 36 | 49 | Mitoxantrone | 36 – 72 | Yes |
| 3 | Braess et al.S3 | 2018 | RCT | 203 | 58 | 53 | Mitoxantrone | 40 | No | No | None reported |
| 4 | Brunnberg et al.S4 | 2012 | RCT | 58 | 68 | 53 | Daunorubicin | 180 – 360 | Yes | No | CTCAE |
| 5 | Chiche et al.S5 | 2021 | Retrospective cohort | 103 | 67 | 48 | CPX-351 | 132 – 220 | Yes | No | None reported |
| 6 | El-Zeiny et al.S6 | 2024 | RCT | 124 | 40 (mean) | 48 | Idarubicin | 36 – 72 | Yes | Yes | CTCAE v5.0 |
| 7 | Feldman et al.S7 | 1997 | RCT | 28 | 70 | 39 | Mitoxantrone | 80 | No | No | None reported |
| 26 | 69 | 35 | 36 |
| 8 | Feldman et al.S8 | 2000 | Single-arm trial | 45 | 41 | 60 | Mitoxantrone | 80 | No | Yes | None reported |
| 9 | Frey et al.S9 | 2019 | RCT | 74 | 57 (mean) | 42 | Daunorubicin | 180 – 405 | No | Yes | CTCAE v4.0 |
| 10 | Garcia-Manero et al.S10 | 2024 | RCT | 261 | 48 | 50 | Daunorubicin | 270 – 405 | No | Yes | CTCAE v4.0 |
| 11 | Godwin et al.S11 | 1998 | RCT | 211 | 68 | 42 | Daunorubicin | 135 – 270 | No | No | SWOG |
| 12 | Grigg et al.S12 | 2005 | Single-arm trial | 43 | 69 | 44 | Mitoxantrone | 30 – 50 | No | No | None reported |
| 13 | Guolo et al.S13 | 2024 | Single-arm trial | 71 | 66 | 45 | CPX-351 | 132 – 220 | Yes | No | CTCAE |
| 14 | Holowiecki et al.S14 | 2004 | RCT | 200 | 46 | 53 | Daunorubicin | 180 – 360 | Yes | No | WHO |
| 15 | Holowiecki et al.S15 | 2012 | RCT | 211 | 47 | 50 | Daunorubicin | 180 | Yes | No | WHO |
| 16 | Jin et al.S16 | 2013 | RCT | 205 | 38 (mean) | 49 | Daunorubicin | 120 – 270 | Yes | No | WHO |
| 17 | Jin et al.S17 | 2015 | Retrospective cohort | 52 | 68 | 37 | Aclarubicin | 42 – 56 | No | No | CTCAE v3.0 |
| 18 | Kalaycio et al.S18 | 2001 | Single-arm trial | 30 | 69 | 50 | Mitoxantrone | 36 – 60 | Yes | No | CTCAE |
| 19 | Lancet et al.S19 | 2014 | RCT | 85 | 68 | 38 | CPX-351 | 132 – 220 | Yes | No | CTCAE v3.0 |
| 41 | 68 | 39 | Daunorubicin | 180 – 360 |
| 20 | Lancet et al.S20 | 2021 | RCT | 153 | 68 | 39 | CPX-351 | 132 – 220 | Yes | Yes | CTCAE v3.0 |
| 156 | 68 | 38 | Daunorubicin | 180 – 300 |
| 21 | Lee et al.S21 | 2006 | Single-arm trial | 41 | 66 | 39 | Daunorubicin | 135 – 225 | No | No | CTCAE v3.0 |
| 22 | Lee et al.S22 | 2017 | RCT | 149 | 49 | 48 | Idarubicin | 36 – 52 | Yes | No | CTCAE v4.0 |
| 23 | Liu Yin et al.S23 | 1991 | Single-arm trial | 104 | 68 | 45 | Mitoxantrone | 40 | No | Yes | WHO |
| 24 | Löwenberg et al.S24 | 2009 | RCT | 411 | 67 | 43 | Daunorubicin | 135 | No | No | CTCAE |
| 402 | 67 | 47 | 270 |
| 25 | Löwenberg et al.S25 | 2011 | RCT | 431 | 49 | 46 | Idarubicin | 36 | Yes | No | CTCAE |
| 26 | Lübbert et al. S26 | 2023 | RCT | 303 | 68 | 40 | Daunorubicin | 180 – 315 | Yes | No | CTCAE v4.0 |
| 27 | Mandelli et al.S27 | 1991 | RCT | 125 | 62 | 42 | Daunorubicin | 135 – 225 | No | Yes | WHO |
| 124 | 63 | 48 | Idarubicin | 36 – 60 | Yes |
| 28 | Megías-Vericat et al.S28 | 2018 | Retrospective cohort | 225 | 53 | 44 | Idarubicin | 36 (24) – 72 | Yes | No | WHO |
| 29 | Morita et al.S29 | 2010 | Clinical trial | 53 | 63 | 30 | Idarubicin | 36 | Yes | No | WHO |
| 30 | Roboz et al.S30 | 2020 | Single-arm trial | 52 | 70 | 52 | CPX-351 | 132 – 220 | Yes | No | CTCAE |
| 31 | Schiller et al.S31 | 1992 | RCT | 51 | 47 | 43 | Daunorubicin | 180 – 360 | Yes | No | WHO |
| 32 | Serve et al.S32 | 2013 | RCT | 95 | 69 | 49 | Daunorubicin | 180 – 360 | Yes | No | CTCAE |
| 33 | Shaikh et al.S33 | 2016 | Retrospective cohort | 80 | Adults | 45 | Mitoxantrone | 80 | No | Yes | None reported |
| 34 | Shaikh et al.S34 | 2023 | Retrospective cohort | 18 | 37 (mean) | 56 | Daunorubicin | 180 | No | Yes | None reported |
| 35 | Shepherd et al.S35 | 1993 | Single-arm trial | 23 | 65 | 48 | Mitoxantrone | 30 – 60 | No | No | WHO |
| 36 | Staib et al.S36 | 1998 | Single-arm trial | 32 | 66 | 50 | Aclarubicin | 100 – 200 | No | No | WHO |
| 37 | Usuki et al.S37 | 2024 | Single-arm trial | 47 | 68 | 34 | CPX-351 | 132 – 220 | Yes | No | CTCAE v5.0 |
| 38 | Van der Jagt et al.S38 | 2006 | Clinical trial | 140 | 52 | 46 | Idarubicin | 36 | Yes | No | ECOG |
| 39 | Vogler et al.S39 | 1992 | RCT | 113 | 61 | 53 | Daunorubicin | 135 – 270 | No | Yes | SECSG |
| 105 | 60 | 47 | Idarubicin | 36 – 72 | Yes |
| 40 | Walker et al.S40 | 2015 | RCT | 252 | 69 | 40 | Daunorubicin | 180 – 300 | Yes | No | None reported |
| 41 | Wang et al.S41 | 2024 | Single-arm trial | 29 | 42 | 38 | Daunorubicin | 180 | Yes | No | CTCAE v.5.0 |
| †Consistent with the 2022 European Leukemia Network (ELN) recommendations2  *Displayed as median unless otherwise specified  CTCAE = Common Terminology Criteria for Adverse Events; ECOG = Eastern Cooperative Oncology Group; LVEF = left ventricular ejection fraction; RCT = randomized controlled trial; SECSG = Southeastern Cancer Study Group; SWOG = Southwest Oncology Group; WHO = World Health Organization | | | | | | | | | | | |

**5 - Figure S1: Pooled proportion of patients with heart failure grouped by daunorubicin dose – random effects model**


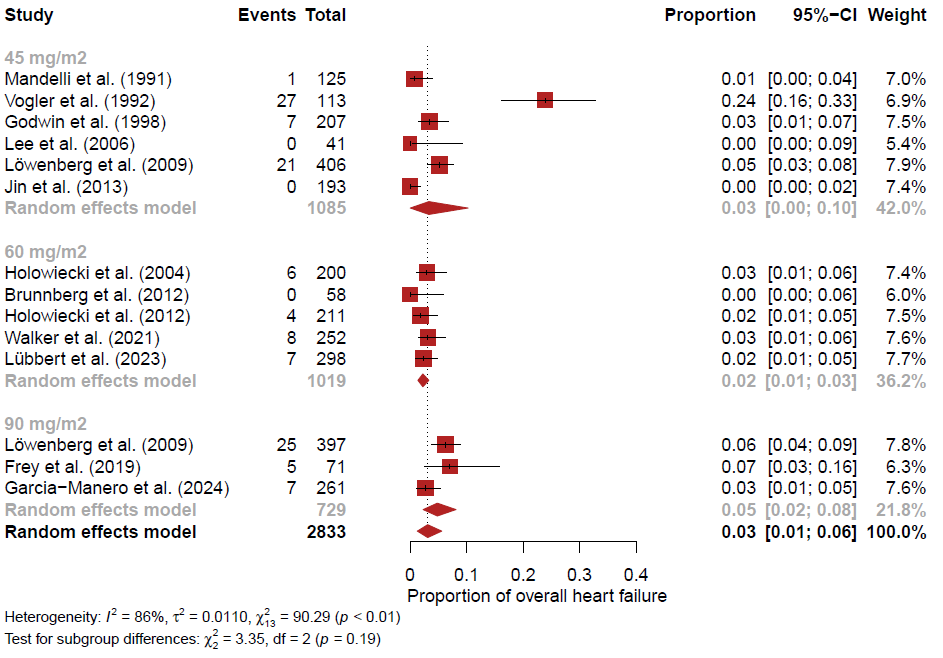


**6 - Figure S2: Pooled proportion of patients with heart failure grouped by daunorubicin dose excluding outlier study – random effects model**

**
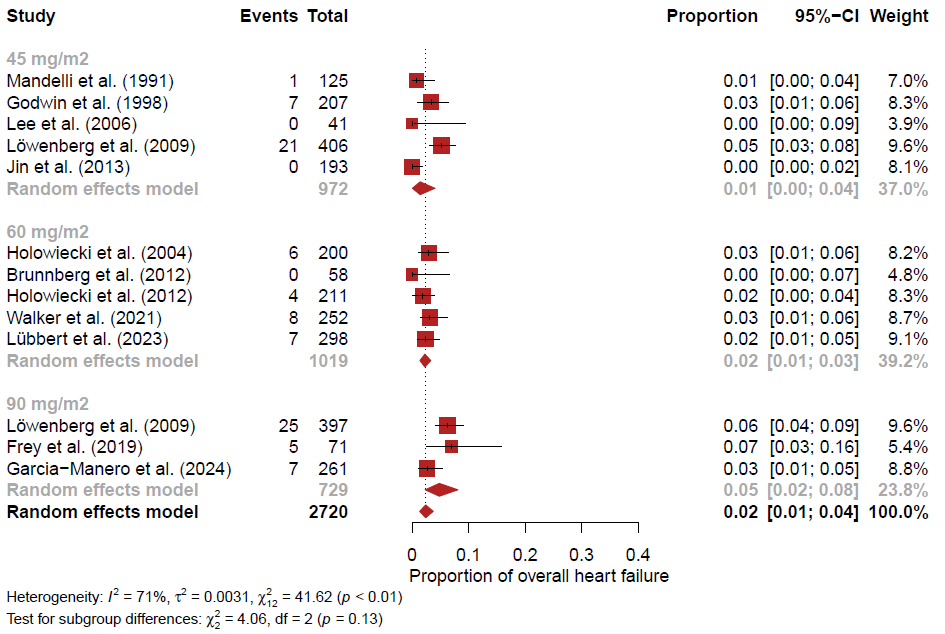
**

**7 - Figure S3: Pooled proportion of heart failure in patients treated with any mitoxantrone-containing remission induction regimen excluding outlier studies – random effects model**

**
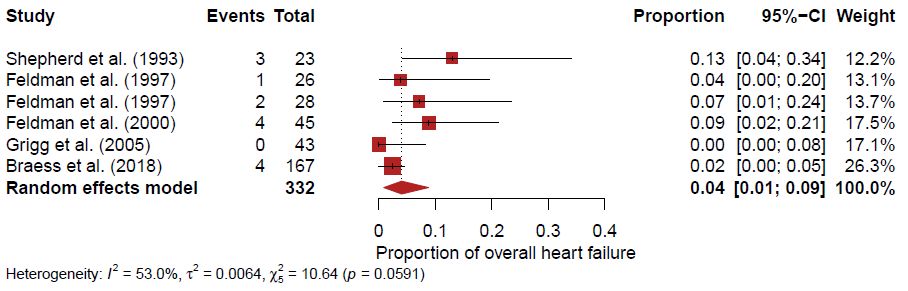
**

**8 - Figure S4: Pooled proportion of heart failure in patients treated with CPX-351 during remission induction therapy – random effects model**

**
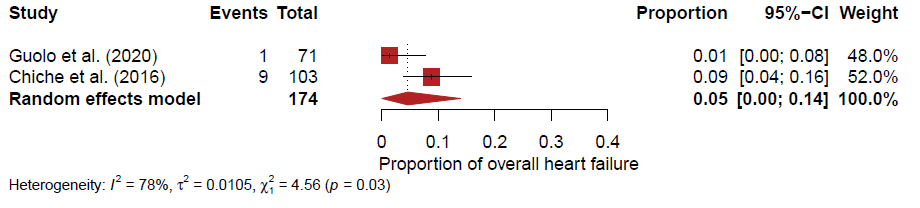
**

**9 - Figure S5: Pooled proportion of patients treated with a remission induction regimen conform ELN 2022 recommendations who died due to heart failure during induction therapy – random effects model**

**
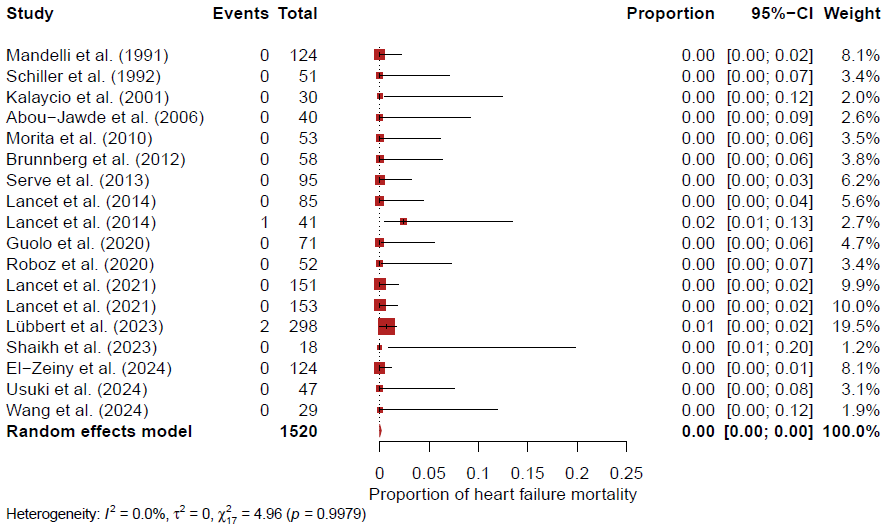
**

**10 - Figure S6: Pooled proportion of patients treated with a remission induction regimen conform ELN 2022 recommendations who discontinued treatment due to heart failure – random effects model**

**
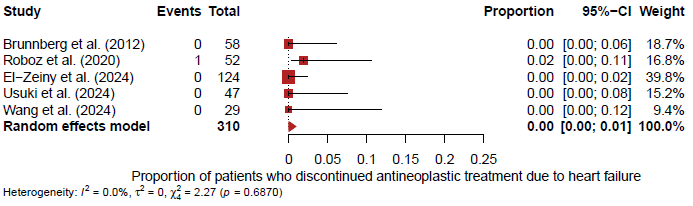
**

**11 - Figure S7: Pooled proportion of grade 3-4 CVAE’s in patients treated with a remission induction regimen conform ELN 2022 recommendations – random effects model**

**
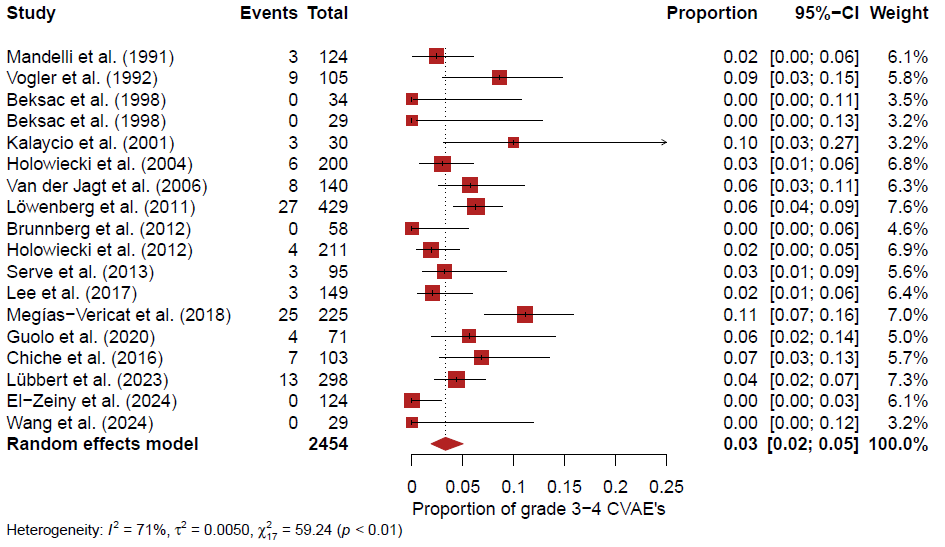
**

**12 - Figure S8: Pooled proportion of grade 1-2 CVAE’s in patients treated with a remission induction regimen conform ELN 2022 recommendations – random effects model**

**
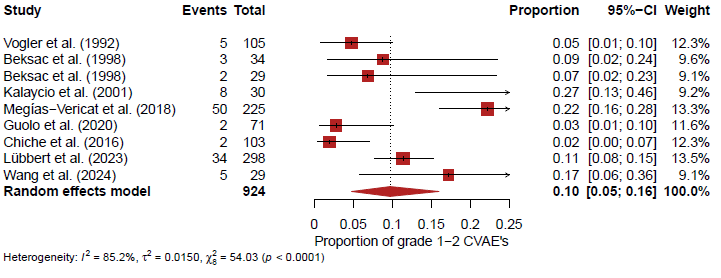
**

**13 - Assessment of risk of bias and quality of adverse event reporting**

To assess the risk of bias for the individual studies in this meta-analysis, we used a modified Cochrane Risk of Bias tool.3 Because cardiovascular adverse events were almost exclusively reported as secondary outcome, we determined that the studies included in this meta-analysis were not prone to bias through random sequence generation (selection bias), allocation concealment (selection bias), blinding of participant and personnel (performance bias) and blinding of outcome assessment (detection bias). Nonetheless, an unclear definition of study population or treatment regimen and selective reporting (reporting bias) were factors deemed to increase the risk of bias in this meta-analysis and therefore carefully evaluated for all studies:

- **Participants:**
  - Low risk: Clear definition of study population and their baseline characteristics provided in a baseline table;
  - Moderate risk: Clear definition of study population, baseline characteristics available but limited in detail;
  - High risk: No clear definition of study population or missing baseline characteristics like median age or sex; lacking baseline table.
- **Intervention:**
  - Low risk: Clear definition of remission induction regimen, including dosage of agents;
  - Moderate risk: No clear definition of cytarabine dose;
  - High risk: No clear definition of remission induction regimen.
- **Cardiovascular adverse events reporting:**
  - Low risk: All cardiovascular adverse events or lack thereof reported in study;
  - Moderate: Complete cardiovascular adverse events report, but unclear if toxicity outcomes was assessed in entire study cohort; adverse events reported as percentages instead of absolute numbers;
  - High risk: Unclarities in reporting of frequencies (e.g. only adverse events occurring in >5% of study population reported) or adverse events not depicted in a table;
  - Not applicable: No cardiovascular adverse events reported in the study: study solely included in the systematic review for cause of death or treatment discontinuation outcomes.
- **Grading system used:**
  - Low risk: Standardized grading system used for the reporting of adverse events;
  - Moderate risk: Standardized grading system used, but without specification of the version;
  - High risk: Adverse events graded, but use of standardized grading system not reported;
  - Not applicable: No cardiovascular adverse events were reported.
- **Cardiovascular adverse event specification:**
  - Low risk: Type of cardiovascular adverse events fully specified;
  - Moderate risk: Type of cardiovascular adverse events specified but limited;
  - High risk: Type of cardiovascular adverse events not specified but grouped together into a single category;
  - Not applicable: No cardiovascular adverse events reported or no cardiovascular adverse events occurred.
- **Cause of death specification**:
  - Low risk: Clear specification of cause of death for all deaths occurring during follow-up;
  - Moderate risk: Causes of deaths specified to a certain degree (e.g. ‘haemorrhage’);
  - High risk: Causes of death specified by organ system (e.g. ‘cardiac death’);
  - Not applicable: Study not included in heart failure-related mortality analysis.

To assess reporting bias related to adverse event reporting and the specification of cardiac adverse events, we utilized an adapted checklist based on the 2022 extension of the CONSORT Statement, "Better Reporting of Harms in Randomized Trials." 4

| Paper section | CONSORT recommendation |
| --- | --- |
| Title and abstract | If the study collected data on harms and benefits, the title or abstract should so state |
| Introduction | If the trial addresses both harms and benefits, the introduction should so state |
| Outcomes (definitions) | List addressed adverse events with definitions for each (with attention, when relevant, to grading, expected vs. unexpected events, reference to standardized and validated definitions, and description of new definitions) |
| Outcomes (collection) | Clarify how harms-related information was collected (mode of data collection, timing, attribution methods, intensity of ascertainment, and harms-related monitoring and stopping rules, if pertinent) |
| Statistical methods | Describe plans for presenting and analysing information on harms (including coding, handling of recurrent events, specification of timing issues, handling of continuous measures, and any statistical analyses) |
| Participant flow | Describe for each arm the participant withdrawals that are due to harms and the experience with the allocated treatment |
| Numbers analysed | Provide the denominators for analyses on harms |
| Rates of outcomes | Present the absolute risk of each adverse event (specifying type, grade, and seriousness per arm), and present appropriate metrics for recurrent events, continuous variables and scale variables, whenever pertinent |
| Ancillary Analyses | Describe any subgroup analyses and exploratory analyses for harms |
| Discussion | Provide a balanced discussion of benefits and harms with emphasis on study limitations, generalizability, and other sources of information on harms |

**Risk of bias – Overview**

Overall risk of bias of individual studies was deemed as ‘low’ if all topics were evaluated as low risk of bias. If one or more topics were regarded as high risk of bias, overall risk was scored as ‘high’. Studies with one or more topics evaluated as ‘moderate risk’, but none as ‘high risk’ were deemed to have overall moderate risk of bias.

**Risk of Bias - Assessment for all individual studies**

| **Reference** | **Author** | **Year** | Participants  **Study population** | Intervention  **Exposure bias** | Cardiac adverse event reporting  **Reporting bias** | Grading system used  **Reporting bias** | Cardiac adverse event specification  **Reporting bias** | Cause of death specification  **Reporting bias** | **Overall risk of bias** |
| --- | --- | --- | --- | --- | --- | --- | --- | --- | --- |
| 1 | Abou-Jawde et al. | 2006 | Moderate | Low | NA | NA | NA | Moderate | Moderate |
| 2 | Beksac et al. | 1998 | Low | Low | Moderate | Low | High | NA | High |
| 3 | Braess et al. | 2018 | Low | Low | Low | High | Moderate | NA | High |
| 4 | Brunnberg et al. | 2012 | Low | Low | Low | Moderate | High | High | High |
| 5 | Chiche et al. | 2021 | Low | Low | Moderate | High | Low | NA | High |
| 6 | El-Zeiny et al. | 2024 | Low | Low | High | Low | Low | Moderate | High |
| 7 | Feldman et al. | 1997 | Low | Low | Low | High | Low | Low | High |
| 8 | Feldman et al. | 2000 | Moderate | Low | Low | High | Moderate | NA | High |
| 9 | Frey et al. | 2019 | Low | Low | Low | Low | Low | NA | Low |
| 10 | Garcia-Manero et al. | 2024 | Low | Low | Low | Low | Low | Low | Low |
| 11 | Godwin et al. | 1998 | Low | Low | High | Low | Moderate | NA | High |
| 12 | Grigg et al. | 2005 | Low | Low | High | High | High | NA | High |
| 13 | Guolo et al.† | 2020 | Low | Low | Moderate | Moderate | Low | Low | Moderate |
| 14 | Holowiecki et al. | 2004 | Low | Low | Moderate | Low | Moderate | NA | Moderate |
| 15 | Holowiecki et al. | 2012 | Low | Low | Moderate | Low | Moderate | NA | Moderate |
| 16 | Jin et al. | 2013 | Low | Low | Low | Low | High | Low | High |
| 17 | Jin et al. | 2015 | Low | Low | Moderate | Low | High | Low | High |
| 18 | Kalaycio et al. | 2001 | Moderate | Low | Moderate | Moderate | Moderate | Low | Moderate |
| 19 | Lancet et al. | 2014 | Low | Low | NA | NA | NA | Moderate | Moderate |
| 20 | Lancet et al. | 2021 | Low | Low | NA | NA | NA | High | High |
| 21 | Lee et al. | 2006 | Low | Low | Low | Low | High | High | High |
| 22 | Lee et al. | 2017 | Low | Low | Low | Low | High | NA | High |
| 23 | Liu Yin et al. | 1991 | Moderate | Low | High | Low | Low | High | High |
| 24 | Löwenberg et al.† | 2009 | Low | Low | Low | Moderate | Low | Low | Moderate |
| 25 | Löwenberg et al. | 2011 | Low | Low | Low | Low | Low | NA | Low |
| 26 | Lübbert et al. | 2023 | Low | Low | Low | Low | Low | Low | Low |
| 27 | Mandelli et al. | 1991 | Low | Low | Moderate | High | Low | Low | High |
| 28 | Megías-Vericat et al. | 2018 | Low | Low | Low | Low | High | NA | High |
| 29 | Morita et al. | 2010 | Low | Low | NA | NA | NA | High | High |
| 30 | Roboz et al. | 2020 | Low | Low | NA | NA | NA | Low | Low |
| 31 | Schiller et al. | 2019 | Low | Low | NA | NA | NA | Moderate | Moderate |
| 32 | Serve et al. | 2013 | Moderate | Low | Moderate | Low | Moderate | Low | Moderate |
| 33 | Shaikh et al. | 2016 | Low | Moderate | Moderate | Low | Low | Low | Moderate |
| 34 | Shaikh et al. | 2023 | Moderate | Low | NA | NA | NA | Low | Moderate |
| 35 | Shepherd et al. | 1993 | Moderate | Low | High | Low | Moderate | High | High |
| 36 | Staib et al. | 1998 | Moderate | Low | High | Low | High | Low | High |
| 37 | Usuki et al. | 2024 | Low | Low | NA | NA | NA | Low | Low |
| 38 | Van der Jagt et al. | 2006 | Low | Low | Low | Moderate | High | NA | High |
| 39 | Vogler et al. | 1992 | Low | Low | Moderate | Low | Moderate | NA | Moderate |
| 40 | Walker et al. | 2021 | Low | Low | Moderate | High | Low | NA | High |
| 41 | Wang et al. | 2024 | Moderate | Low | Low | Low | High | Low | High |
| † Additional data received from author or research foundation | | | | | | | | | |

**14 - References**

**[1]** Page MJ, McKenzie JE, Bossuyt PM, Boutron I, Hoffmann TC, Mulrow CD, et al. Updating guidance for reporting systematic reviews: development of the PRISMA 2020 statement. Journal of Clinical Epidemiology. 2021; 134(134):103–12.

**[2]** Döhner H, Wei AH, Appelbaum FR, Craddock C, DiNardo CD, Dombret H, et al. Diagnosis and Management of AML in Adults: 2022 ELN Recommendations from an International Expert Panel. Blood. 2022; 140(12).

**[3]** Sterne JAC, Savović J, Page MJ, Elbers RG, Blencowe NS, Boutron I, et al. RoB 2: a revised tool for assessing risk of bias in randomised trials. BMJ. 2019; 366(1):l4898.

**[4]** Junqueira DR, Zorzela L, Golder S, Loke Y, Gagnier JJ, Julious SA, et al. CONSORT Harms 2022 statement, explanation, and elaboration: updated guideline for the reporting of harms in randomised trials. BMJ. 2023; 381:e073725.

**Continued references main paper**

**[61]** Fujiwara S, Murahashi R, Nakashima H, Matsuoka S, Ikeda T, Toda Y, et al. Effect of cumulative daunorubicin dose on cardiotoxicity after allogeneic stem cell transplantation. Leukemia Research. 2022; 121:106951.

**[62]** Fernandez HF, Sun Z, Yao X, Litzow MR, Luger SM, Paietta EM, et al. Anthracycline Dose Intensification in Acute Myeloid Leukemia. New England Journal of Medicine. 2009; 361(13):1249–59.

**[63]** Lee JH, Joo YD, Kim H, Bae SH, Kim MK, Zang DY, et al. A randomized trial comparing standard versus high-dose daunorubicin induction in patients with acute myeloid leukemia. Blood. 2011; 118(14):3832–41.

**[64]** Burnett AK, Russell NH, Hills RK, Kell J, Cavenagh J, Kjeldsen L, et al. A randomized comparison of daunorubicin 90 mg/m 2 vs 60 mg/m 2 in AML induction: results from the UK NCRI AML17 trial in 1206 patients . Blood. 2015; 125(25):3878–85.

**[65]** Röllig C, Steffen B, Schliemann C, Mikesch JH, Alakel N, Herbst R, et al. Single or Double Induction With 7 + 3 Containing Standard or High-Dose Daunorubicin for Newly Diagnosed AML: The Randomized DaunoDouble Trial by the Study Alliance Leukemia. Journal of Clinical Oncology. 2024; JCO2400235.

**[66]** Common Terminology Criteria for Adverse Events (CTCAE). U.S. DEPARTMENT OF HEALTH AND HUMAN SERVICES, National Institutes of Health. National Cancer Institute. 2017. [ctep.cancer.gov/protocoldevelopment/electronic_applications/docs/ctcae_v5_quick_reference_5x7.pdf](https://ctep.cancer.gov/protocoldevelopment/electronic_applications/docs/ctcae_v5_quick_reference_5x7.pdf). Accessed 21-10-2024.

**[67]** Witteles RM, Telli M. Underestimating Cardiac Toxicity in Cancer Trials: Lessons Learned? Journal of Clinical Oncology. 2012; 30(16):1916–8.

**[68]** Le Deley MC, Leblanc T, Shamsaldin A, Raquin MA, Lacour B, Sommelet D, et al. Risk of Secondary Leukemia After a Solid Tumor in Childhood According to the Dose of Epipodophyllotoxins and Anthracyclines: A Case-Control Study by the Société Française d’Oncologie Pédiatrique. Journal of Clinical Oncology. 2003 Mar 15;21(6):1074–81.

**[69]** Feijen EAM, Leisenring WM, Stratton KL, Ness KK, van der Pal HJH, van Dalen EC, et al. Derivation of Anthracycline and Anthraquinone Equivalence Ratios to Doxorubicin for Late-Onset Cardiotoxicity. JAMA Oncology. 2019; 5(6):864.

**[70]** Lyon AR, López-Fernández T, Couch LS, Asteggiano R, Aznar MC, Bergler-Klein J, et al. 2022 ESC Guidelines on cardio-oncology developed in collaboration with the European Hematology Association (EHA), the European Society for Therapeutic Radiology and Oncology (ESTRO) and the International Cardio-Oncology Society (IC-OS). European Heart Journal. 2022; 43(41).

**[71]** Owattanapanich W, Owattanapanich N, Kungwankiattichai S, Ungprasert P, Ruchutrakool T. Efficacy and Toxicity of Idarubicin Versus High-dose Daunorubicin for Induction Chemotherapy in Adult Acute Myeloid Leukemia: A Systematic Review and Meta-analysis. Clinical Lymphoma Myeloma and Leukemia. 2018; 18(12):814-821.e3.

**[72]** Wang H, Xiao X, Xiao Q, Lu Y, Wu Y. The efficacy and safety of daunorubicin versus idarubicin combined with cytarabine for induction therapy in acute myeloid leukemia. Medicine. 2020; 99(24):e20094.

**[73]** Mandelli F, Vignetti M, Suciu S, Stasi R, Petti MC, Meloni G, et al. Daunorubicin Versus Mitoxantrone Versus Idarubicin As Induction and Consolidation Chemotherapy for Adults With Acute Myeloid Leukemia: The EORTC and GIMEMA Groups Study AML-10. Journal of Clinical Oncology. 2009 Oct 14;27(32):5397–403.

**[74]** Rowe JM, Neuberg D, Friedenberg W, Bennett JM, Paietta E, Makary AZ, et al. A phase 3 study of three induction regimens and of priming with GM-CSF in older adults with acute myeloid leukemia: a trial by the Eastern Cooperative Oncology Group. Blood. 2004 Jan 15;103(2):479–85.

**[75]** Beksaç M, Arslan Ö, Koç H, Akan H, Ilhan O, Arat M, et al. Randomised unicenter trial for comparison of three regimens in de novo adult acute nonlymphoblastic leukaemia. Medical Oncology. 1998; 15(3):183–90.

**[76]** Lancet JE, Cortes JE, Hogge DE, Tallman MS, Kovacsovics TJ, Damon LE, et al. Phase 2 trial of CPX-351, a fixed 5:1 molar ratio of cytarabine/daunorubicin, vs cytarabine/daunorubicin in older adults with untreated AML. Blood. 2014; 22;123(21):3239–46.

**[77]** Lancet JE, Uy GL, Newell LF, Lin TL, Ritchie EK, Stuart RK, et al. CPX-351 versus 7+3 cytarabine and daunorubicin chemotherapy in older adults with newly diagnosed high-risk or secondary acute myeloid leukaemia: 5-year results of a randomised, open-label, multicentre, phase 3 trial. The Lancet Haematology. 2021; 8(7):e481–91.

**Studies included in meta-analyses**

**[S1]** Abou-Jawde RM, Sobecks R, Pohlman B, Rybicki L, Advani A, Sekeres M, et al. The role of post-remission chemotherapy for older patients with acute myelogenous leukemia. Leukemia & Lymphoma. 2006; 47(4):689–95.

**[S2]** Beksaç M, Arslan Ö, Koç H, Akan H, Ilhan O, Arat M, et al. Randomised unicenter trial for comparison of three regimens in de novo adult acute nonlymphoblastic leukaemia. Medical Oncology. 1998; 15(3):183–90.

**[S3]** Braess J, Amler S, Kreuzer KA, Karsten Spiekermann, Lindemann HW, Lengfelder E, et al. Sequential high-dose cytarabine and mitoxantrone (S-HAM) versus standard double induction in acute myeloid leukemia—a phase 3 study. Leukemia. 2018; 32(12):2558–71.

**[S4]** Brunnberg U, Mohr M, Noppeney R, Dürk HA, Sauerland MC, Müller-Tidow C, et al. Induction therapy of AML with ara-C plus daunorubicin versus ara-C plus gemtuzumab ozogamicin: a randomized phase II trial in elderly patients. Annals of Oncology. 2012; 23(4):990–6.

**[S5]** Chiche E, Rahmé R, Bertoli S, Dumas PY, Micol JB, Hicheri Y, et al. Real-life experience with CPX-351 and impact on the outcome of high-risk AML patients: a multicentric French cohort. Blood Advances. 2021; 5(1):176–84.

**[S6]** El Zeiny A, Abdel-Fattah R, Abbassie M, Farid S. Idarubicin versus Doxorubicin in Acute Myeloid Leukemia: A Parallel Randomized Trial with Pharmacoeconomic Analysis. Pharmaceutical Sciences. 2023; 19;30(1):135–42.

**[S7]** Feldman E, Seiter K, Damon L, Linker C, Rugo H, Ries C, et al. A randomized trial of high- vs standard-dose mitoxantrone with cytarabine in elderly patients with acute myeloid leukemia. Leukemia. 1997; 11(4):485–9.

**[S8]** Feldman EJ, Seiter K, Traganos F, Darzynkiewicz Z, Goff H, Pozzuoli M, et al. Phase II Evaluation of a High-Dose Mitoxantrone Based Induction Regimen in Untreated Adults with Acute Myeloid Leukemia. Leukemia & Lymphoma. 2000; 38(3-4):309–15.

**[S9]** Frey N, Jang JH, Szer J, Illés Á, Kim HJ, Ram R, et al. Eltrombopag treatment during induction chemotherapy for acute myeloid leukaemia: a randomised, double-blind, phase 2 study. The Lancet Haematology. 2019; 6(3):e122–31.

**[S10]** Garcia-Manero G, Podoltsev NA, Othus M, Pagel JM, Radich JP, Fang M, et al. A randomized phase III study of standard versus high-dose cytarabine with or without vorinostat for AML. Leukemia. 2023; 38(1):58–66.

**[S11]** Godwin JE, Kopecky KJ, Head DR, Willman CL, Leith CP, Hynes HE, et al. A double-blind placebo-controlled trial of granulocyte colony-stimulating factor in elderly patients with previously untreated acute myeloid leukemia: a Southwest oncology group study (9031). Blood. 1998; 91(10):3607–15.

**[S12]** Grigg A, Reynolds J, McQuillan A, Juneja S, Iulio JD, Hui C, et al. Prognostic features for response and survival in elderly patients withde novoacute myeloid leukemia treated with mitoxantrone and intermediate dose cytarabine. Leukemia & Lymphoma. 2005; 46(3):367–75.

**[S13]** Guolo F, Fianchi L, Minetto P, Clavio M, Gottardi M, Galimberti S, et al. CPX-351 treatment in secondary acute myeloblastic leukemia is effective and improves the feasibility of allogeneic stem cell transplantation: results of the Italian compassionate use program. Blood Cancer Journal. 2020; 10(10):1–11.

**[S14]** Holowiecki J, Grosicki S, Robak T, Kyrcz-Krzemien S, Giebel S, Hellmann A, et al. Addition of cladribine to daunorubicin and cytarabine increases complete remission rate after a single course of induction treatment in acute myeloid leukemia. Multicenter, phase III study. Leukemia. 2004; 18(5):989–97.

**[S15]** Holowiecki J, Grosicki S, Giebel S, Robak T, Kyrcz-Krzemien S, Kuliczkowski K, et al. Cladribine, But Not Fludarabine, Added to Daunorubicin and Cytarabine During Induction Prolongs Survival of Patients With Acute Myeloid Leukemia: A Multicenter, Randomized Phase III Study. Journal of Clinical Oncology. 2012; 30(20):2441–8.

**[S16]** Jin J, Wang JX, Chen FF, Wu DP, Hu J, Zhou JF, et al. Homoharringtonine-based induction regimens for patients with de-novo acute myeloid leukaemia: a multicentre, open-label, randomised, controlled phase 3 trial. The Lancet Oncology. 2013; 14(7):599–608.

**[S17]** Jin J, Chen J, Suo S, Qian W, Meng H, Mai W, et al. Low-dose cytarabine, aclarubicin and granulocyte colony-stimulating factor priming regimen versus idarubicin plus cytarabine regimen as induction therapy for older patients with acute myeloid leukemia. Leukemia & Lymphoma. 2014; 56(6):1691–7.

**[S18]** Kalaycio M, Pohlman B, Elson P, Lichtin A, Hussein M, Tripp B, et al. Chemotherapy for Acute Myelogenous Leukemia in the Elderly With Cytarabine, Mitoxantrone, and Granulocyte-Macrophage Colony-Stimulating Factor. American Journal of Clinical Oncology. 2001; 24(1):58–63.

**[S19]** Lancet JE, Cortes JE, Hogge DE, Tallman MS, Kovacsovics TJ, Damon LE, et al. Phase 2 trial of CPX-351, a fixed 5:1 molar ratio of cytarabine/daunorubicin, vs cytarabine/daunorubicin in older adults with untreated AML. Blood. 2014; 22;123(21):3239–46.

**[S20]** Lancet JE, Uy GL, Newell LF, Lin TL, Ritchie EK, Stuart RK, et al. CPX-351 versus 7+3 cytarabine and daunorubicin chemotherapy in older adults with newly diagnosed high-risk or secondary acute myeloid leukaemia: 5-year results of a randomised, open-label, multicentre, phase 3 trial. The Lancet Haematology. 2021; 8(7):e481–91.

**[S21]** Lee JH, Choi SJ, Lee JH, Park JH, Kim H, Joo YD, et al. Standard induction chemotherapy followed by attenuated consolidation in elderly patients with acute myeloid leukemia. Annals of Hematology. 2006; 85(6):357–65.

**[S22]** Lee JH, Kim H, Joo YD, Lee WS, Bae SH, Zang DY, et al. Prospective Randomized Comparison of Idarubicin and High-Dose Daunorubicin in Induction Chemotherapy for Newly Diagnosed Acute Myeloid Leukemia. Journal of Clinical Oncology. 2017; 35(24):2754–63.

**[S23]** Yin JAL, Johnson PRE, Davies JM, Flanagan NG, Gorst DW, Lewis MJ. Mitozantrone and cytosine arabinoside as first‐line therapy in elderly patients with acute myeloid leukaemia. British Journal of Haematology. 1991; 79(3):415–20.

**[S24]** Löwenberg B, Ossenkoppele GJ, van Putten W, Schouten HC, Graux C, Ferrant A, et al. High-Dose Daunorubicin in Older Patients with Acute Myeloid Leukemia. New England Journal of Medicine. 2009; 361(13):1235–48.

**[S25]** Löwenberg B, Pabst T, Vellenga E, van Putten W, Schouten HC, Graux C, et al. Cytarabine Dose for Acute Myeloid Leukemia. New England Journal of Medicine. 2011; 364(11):1027–36.

**[S26]** Lübbert M, Wijermans PW, Kicinski M, Chantepie S, Van der Velden WJFM, Noppeney R, et al. 10-day decitabine versus 3 + 7 chemotherapy followed by allografting in older patients with acute myeloid leukaemia: an open-label, randomised, controlled, phase 3 trial. The Lancet Haematology. 2023; 10(11):e879–89.

**[S27]** Mandelli F, Petti MC, Ardia A, Di Pietro N, Di Raimondo F, Ganzina F, et al. A randomised clinical trial comparing idarubicin and cytarabine to daunorubicin and cytarabine in the treatment of acute non-lymphoid leukaemia. European Journal of Cancer and Clinical Oncology. 1991; 27(6):750–5.

**[S28]** Megías-Vericat JE, Montesinos P, Herrero MJ, Moscardó F, Bosó V, Rojas L, et al. Impact of NADPH oxidase functional polymorphisms in acute myeloid leukemia induction chemotherapy. The Pharmacogenomics Journal. 2017; 18(2):301–7.

**[S29]** Morita Y, Kanamaru A, Miyazaki Y, Imanishi D, Yagasaki F, Tanimoto M, et al. Comparative analysis of remission induction therapy for high-risk MDS and AML progressed from MDS in the MDS200 study of Japan Adult Leukemia Study Group. International Journal of Hematology. 2010; 91(1):97–103.

**[S30]** Roboz GJ, Larson ML, Rubenstein SE, Solomon SR, Schiller GJ, An Q, et al. Final safety and efficacy results from the CPX-351 early access program for older patients with high-risk or secondary acute myeloid leukemia. Leukemia & Lymphoma. 2020; 61(5):1188–94.

**[S31]** Schiller G, Gajewski J, Nimer S, Territo M, Ho W, Lee M, et al. A randomized study of intermediate versus conventional‐dose cytarabine as intensive induction for acute myelogenous leukaemia. British Journal of Haematology. 1992; 81(2):170–7.

**[S32]** Serve H, Krug U, Wagner R, Sauerland MC, Heinecke A, Brunnberg U, et al. Sorafenib in combination with intensive chemotherapy in elderly patients with acute myeloid leukemia: results from a randomized, placebo-controlled trial. Journal of Clinical Oncology: Official Journal of the American Society of Clinical Oncology. 2013; 31(25):3110–8.

**[S33]** Shaikh AY, Suryadevara S, Tripathi A, Ahmed M, Kane JL, Escobar J, et al. Mitoxantrone-Induced Cardiotoxicity in Acute Myeloid Leukemia-A Velocity Vector Imaging Analysis. Echocardiography. 2016; 33(8):1166–77.

**[S34]** Shaikh MR, Singh B, Halder R, Singh R, Shaikh MR, Agarwal N, et al. FLAG based v/s Standard 3 + 7 induction therapy in treatment naïve Acute Myeloid Leukemia: Time to think “beyond anthracyclines.” Leukemia Research. 2023; 28;132:107346–6.

**[S35]** Shepherd JD, Reece DE, Barnett MJ, Klingemann HG, Nantel SH, Sutherland HJ, et al. Induction Therapy for Acute Myelogenous Leukemia in Patients Over 60 Years with Intermediate-Dose Cytosine Arabinoside, Mitoxantrone and Etoposide. Leukemia & Lymphoma. 1993; 9(3):211–5.

**[S36]** Staib P, Lathan B, Knöppel-Schwark S, Tesch H, Voliotis D, Steinmetz HT, et al. Cytosine arabinoside, etoposide and aclarubicin (AVA) for the treatment of acute myeloid leukemia (AML) in elderly patients. Annals of Oncology. 1998; 1;9(2):221–3.

**[S37]** Usuki K, Miyamoto T, Yamauchi T, Ando K, Ogawa Y, Onozawa M, et al. A phase 1/2 study of NS-87/CPX-351 (cytarabine and daunorubicin liposome) in Japanese patients with high-risk acute myeloid leukemia. International Journal of Hematology. 2024; 119(6):647–59.

**[S38]** Van Der Jagt R, Robinson KS, Belch A, Yetisir E, Wells G, Larratt L, et al. Sequential response-adapted induction and consolidation regimens idarubicin/cytarabine and mitoxantrone/etoposide in adult acute myelogenous leukemia: 10 year follow-up of a study by the Canadian Leukemia Studies Group. Leukemia & Lymphoma. 2006; 47(4):697–706.

**[S39]** Vogler WR, Velez-Garcia E, Weiner RS, Flaum MA, Bartolucci AA, Omura GA, et al. A phase III trial comparing idarubicin and daunorubicin in combination with cytarabine in acute myelogenous leukemia: a Southeastern Cancer Study Group Study. Journal of Clinical Oncology. 1992; 10(7):1103–11.

**[S40]** Walker AR, Marcucci G, Yin J, Blum W, Stock W, Kohlschmidt J, et al. Phase 3 randomized trial of chemotherapy with or without oblimersen in older AML patients: CALGB 10201 (Alliance). Blood Advances. 2021; 5(13):2775–87.

**[S41]** Wang R, Zhang Y, Chang J, Wang H, Lou Y, Yang M, et al. Venetoclax plus daunorubicin and cytarabine in newly diagnosed acute myeloid leukemia patients: A propensity score‐matched analysis. Hematological Oncology. 2024; 28;42(2).
